# Supplementary material for: The evolutionary origin of naturally occurring intermolecular Diels-Alderases from Morus alba
Source: Nat Commun. 2024 Mar 20;15:2492. doi: 10.1038/s41467-024-46845-0 (PMC10954736; doi:10.1038/s41467-024-46845-0)
Supplement: Supplementary file 4 — Source Data [file 41467_2024_46845_MOESM4_ESM.xlsx]

## Sheet: main
The evolutionary origin of naturally occurring intermolecular Diels-Alderases from Morus alba
Qi Ding†, Nianxin Guo†, Lei Gao*, Michelle McKee, Dongshan Wu, Jun Yang, Junping Fan, Jing-Ke Weng, Xiaoguang Lei*

## Sheet: Fig.2c
	DA/DS_replicate1	DA/DS_replicate2	DA/DS_replicate3	OC_replicate1	OC_replicate2	OC_replicate3
MaMO	-59.4396	-53.8187	-53.8465	0	0	0
MaDS2	-49.9555	-45.1899	-46.0158	0	0	0
MaDS3	-33.8777	-36.4844	-37.4827	0	0	0
MaDS7	-42.0063	-45.0012	-46.7583	0	0	0
MaDS4	-49.8894	-41.7628	-35.5473	0	0	0
MaDS5	-33.0039	-21.0133	-17.3817	0	0	0
MaDS6	-50.632	-52.0248	-54.009	5.99728	8.47512	6.95568
MaDS1	-35.2054	-32.6899	-31.2513	32.1022	39.5717	38.5841
MaOC1	0	0	0	5.56191	5.73235	4.92939
ancDADS	0	0	0	91.2544	114.055	94.6906
ancDA	-1.31605	-1.14003	-1.2969	1.18441	0.948822	1.08912
MaDA1	-1.39671	-1.43974	-1.38126	2.55553	2.78835	2.68293
MaDA4	-1.35141	-1.34497	-1.304	0.761408	0.742193	0.872883
MaDA7	-0.47609	-0.48578	-0.47225	0	0	0
MaDA8	-0.54479	-0.47287	-0.55378	0	0	0
MaDA6	-0.99559	-0.98634	-1.03693	0	0	0
MaDA	-1.47522	-1.44776	-1.08239	0	0	0
MaDA5	-1.43285	-1.32179	-1.33357	0	0	0

## Sheet: Fig.3e
	replicate1	replicate2	replicate3
ancDA-WT	102.813	100.852	96.3347
ancDA-P47Q	154.849	109.656	127.769
ancDA-G153C	58.3794	77.6667	104.377
ancDA-D236E	24.3524	25.3193	23.9283
ancDA-V237A	190.939	187.263	192.374
ancDA-V238K	151.382	144.93	80.6291
ancDA-L287E	164.529	160.369	71.4357
ancDA-I289S	553.844	418.495	251.184
ancDA-I290F	245.583	242.738	87.3263
ancDA-I328F	20.1519	38.5673	39.7826
ancDA-L348S	0	0	0
ancDA-E351N	111.446	91.9755	46.1381
ancDA-K353S	545.709	537.27	185.35
ancDA-A354S	44.2788	47.195	23.5859
ancDA-L357A	0	0	0
ancDA-I383V	100.822	120.673	39.3449
ancDA-E385R	54.3441	51.6983	29.0198
ancDA-Y387L	81.122	86.1876	27.5537
ancDA-E389D	0	0	0
ancDA-L417I	0	0	0
ancDA-R418H	0	0	0
ancDA-M420L	130.093	118.476	52.9509

## Sheet: Fig.4
	endo-5_replicate1	endo-5_replicate2	endo-5_replicate3	exo-7_replicate1	exo-7_replicate2	exo-7_replicate3	endo-8_replicate1	endo-8_replicate2	endo-8_replicate3	exo-9_replicate1	exo-9_replicate2	exo-9_replicate3
ancDA	43.3447	35.993	43.821	2.24834	2.6539	1.83485	0	0	0	0	0	0
ancDADS_mut7	4.2152	5.56255	6.01098	0.945636	2.10496	1.33081	1.42928	0.779194	0.825306	0.957885	0.825948	0.733971
ancDADS_mut6	3.03033	4.29493	5.23773	0	0.026188	0	15.6426	12.3306	12.7564	20.7846	15.454	15.3048
ancDADS_mut5b	2.85196	2.86038	2.86173	0	0	0	11.0674	11.061	10.9751	11.0351	11.1132	11.0239
ancDADS_mut5a	2.23839	2.35699	2.40711	0.006045	0.091331	0.112683	1.59309	1.78464	1.88812	3.28485	3.50088	3.5802
ancDADS_mut4	2.07664	2.05184	2.13065	0	0	0	0.761568	0.550012	0.686403	1.9525	1.96161	2.04601
ancDADS_mut3b	0	0	0	0	0	0	0	0	0	0	0	0
ancDADS_mut3a	0	0	0	0	0	0	0	0	0	0	0	0
ancDADS_mut2b	0	0	0	0	0	0	0	0	0	0	0	0
ancDADS_mut2a	0	0	0	0	0	0	0	0	0	0	0	0
ancDADS_WT	0	0	0	0	0	0	0	0	0	0	0	0

## Sheet: Fig.5b
	50uM morachalcone A			150uM morachalcone A			500uM morachalcone A
moracin C/uM	replicate1	replicate2	replicate3	replicate1	replicate2	replicate3	replicate1	replicate2	replicate3
20	1.62035	1.52966	1.45401	0.548071	0.654159	0.572914	0.411331	0.32078	0.335599
40	1.43497	1.7565	1.73579	0.498489	0.769914	0.792572	0.57617	0.493307	0.522528
60	1.7944	1.60964	1.78988	1.094	1.35511	1.30202	0.723444	0.798926	0.76482
80	1.72775	1.85093	1.80678	1.40047	1.0426	1.43184	0.870162	1.02865	0.849655
150	1.99968	1.85279	1.65487	1.63965	2.01911	1.90543	1.18025	1.32269	1.22299
Conversion to inverse
	50uM morachalcone A (1/v)			150uM morachalcone A (1/v)			500uM morachalcone A (1/v)
moracin C/uM (1/S)	replicate1	replicate2	replicate3	replicate1	replicate2	replicate3	replicate1	replicate2	replicate3
0.05	0.617151	0.65374	0.687753	1.82458	1.52868	1.74546	2.43113	3.1174	2.97975
0.025	0.696877	0.569316	0.576106	2.00606	1.29885	1.26171	1.7356	2.02714	1.91377
0.0166667	0.557289	0.621258	0.558697	0.914079	0.737947	0.768037	1.38228	1.25168	1.3075
0.0125	0.578789	0.540269	0.553471	0.714045	0.959142	0.698402	1.14921	0.972151	1.17695
0.00666667	0.500081	0.539726	0.604276	0.609888	0.495269	0.524817	0.847278	0.756032	0.817671

## Sheet: Fig.5c
rdf	MaDA1	ancDA	ancDADS-mut4	ancDADS
0	0	0	0	0
0.1	0	0	0	0
0.2	0	0	0	0
0.3	0	0	0	0
0.4	0	0	0	0
0.5	0	0	0	0
0.6	0	0	0	0
0.7	0	0	0	0
0.8	0	0	0	0
0.9	0	0	0	0
1	0	0	0	0
1.1	0	0	0	0
1.2	0	0	0	0
1.3	0	0	0	0
1.4	0	0	0	0
1.5	0	0	0	0
1.6	0	0	0	0
1.7	0	0	0	0
1.8	0	0	0	0
1.9	0	0	0	0
2	0	0	0	0
2.1	0	0	0	0
2.2	0	0	0	0
2.3	0	0	0	0
2.4	0	0	0	0
2.5	0	0	0	0
2.6	0	0	0	0
2.7	0	0	0	0
2.8	0	0	0	0
2.9	0	0	0	0
3	0	0	0	0
3.1	0	3.35414	0	0
3.2	0	12.5783	0	0
3.3	0	17.7243	1.52161	0
3.4	23.0947	52.8265	1.43213	0
3.5	30.4855	65.5377	20.2548	0
3.6	82.2639	89.1327	38.2597	0
3.7	105.055	91.3422	84.4483	0
3.8	106.899	84.317	129.15	0
3.9	97.9212	97.8874	137.709	0
4	86.3815	80.9948	134.946	0
4.1	79.0082	84.654	133.264	0
4.2	57.1875	64.3178	90.5233	0
4.3	51.6582	75.1469	72.0764	0
4.4	27.3947	55.2417	45.8672	0
4.5	13.0887	34.666	47.8872	0
4.6	5.00788	26.3765	25.62	0
4.7	2.39741	20.925	17.0967	0
4.8	6.89259	12.4468	7.12365	0
4.9	0	7.29598	6.14964	0
5	0	7.00418	1.96789	0
5.1	0	2.44711	1.26049	0
5.2	0	4.706	1.21201	0
5.3	0	3.96238	1.16628	0
5.4	7.24443	2.72546	0	0
5.5	5.23577	0.525272	0.541129	0
5.6	3.36587	0.506515	0.521805	0
5.7	4.87167	0.488744	0	0
5.8	4.70369	0	0	0
5.9	12.118	0.455898	0	0
6	20.4997	0	0	0
6.1	16.9952	0	0	0
6.2	20.5587	0.412506	0	0
6.3	22.5603	0	0	0
6.4	19.2841	0	0	0
6.5	12.4605	0	0	0
6.6	13.2913	0	0	0
6.7	14.0668	0	0	0
6.8	6.82654	0	0	0
6.9	11.0478	0	0	0
7	3.21965	0	0	0
7.1	7.30091	0	0	0
7.2	3.04205	0	0	0
7.3	5.91743	0	0	0
7.4	1.91917	0	0	0
7.5	0	0	0	0
7.6	5.45652	0	0	0
7.7	1.7716	0	0	0
7.8	0	0	0	0
7.9	0	0	0	0
8	0	0	0	0
8.1	0	0	0	0
8.2	0.780448	0	0	0
8.3	0	0	0	0
8.4	0	0	0	0
8.5	0.726016	0	0	0
8.6	0	0	0	0
8.7	0	0	0	0
8.8	0	0	0	0
8.9	0	0	0	0
9	0	0	0	0
9.1	0	0	0	0
9.2	0	0	0	0
9.3	0	0	0	0
9.4	0	0	0	0
9.5	0	0	0	0
9.6	0	0	0	0
9.7	0	0	0	0
9.8	0	0	0	0
9.9	0	0	0	0
10	0	0	0	0
10.1	0	0	0	0
10.2	0	0	0	0
10.3	0	0	0	0
10.4	0	0	0	0
10.5	0	0	0	0
10.6	0	0	0	0
10.7	0	0	0	0
10.8	0	0	0	0
10.9	0	0	0	0
11	0	0	0	0
11.1	0	0	0	0
11.2	0	0	0	0
11.3	0	0	0	0
11.4	0	0	0	0
11.5	0	0	0	0
11.6	0	0	0	0
11.7	0	0	0	0
11.8	0	0	0	0
11.9	0	0	0	0
12	0	0	0	0
12.1	0	0	0	3.09866
12.2	0	0	0	0
12.3	0	0	0	2.99831
12.4	0	0	0	5.8999
12.5	0	0	0	8.70825
12.6	0	0	0	8.57003
12.7	0	0	0	14.0585
12.8	0	0	0	24.9098
12.9	0	0	0	54.497
13	0	0	0	40.2439
13.1	0	0	0	76.6171
13.2	0	0	0	83.2621
13.3	0	0	0	61.5075
13.4	0	0	0	98.458
13.5	0	0	0	94.5122
13.6	0	0	0	102.925
13.7	0	0	0	74.8593
13.8	0	0	0	52.356
13.9	0	0	0	56.2938
14	0	0	0	32.369
14.1	0	0	0	34.1891
14.2	0	0	0	22.4717
14.3	0	0	0	13.2945
14.4	0	0	0	6.55491
14.5	0	0	0	4.30966
14.6	0	0	0	8.50126
14.7	0	0	0	8.3856
14.8	0	0	0	4.13614
14.9	0	0	0	0
15	0	0	0	2.01311
15.1	0	0	0	0
15.2	0	0	0	0
15.3	0	0	0	0
15.4	0	0	0	0
15.5	0	0	0	0
15.6	0	0	0	0
15.7	0	0	0	0
15.8	0	0	0	0
15.9	0	0	0	0
16	0	0	0	0

## Sheet: SI.Fig.3d
ancDADS & moracin C
	relative activity
Tem./°C	replicate1	replicate2	replicate3
20	10.38	6.66	10.02
30	13.2	17.89	13.36
40	39.78	29.98	34.29
50	62.13	92.71	82.27
60	96.98	78.94	92.63
70	91.07	none	100
80	78.1	76.97	87.63
90	55.43	62.69	55.7
100	45.94	36.49	35.36
none indicates that the results are not shown due to experiments, etc.,.

## Sheet: SI.Fig.3e
ancDADS & marochalcone A
	relative activity
Tem./°C	replicate1	replicate2	replicate3
30	17.81	19.59	21.19
40	38.01	26.98	31.86
50	48.7	52.74	60.53
60	82.39	66.62	49.67
70	107.6	100	90.68
80	73.26	70.44	69.38
90	33.63	30.01	40.44
100	13.13	none	12.03
none indicates that the results are not shown due to experiments, etc.,.

## Sheet: SI.Fig.12a
Chr	Start	End
Chr1	0	65830693
Chr2	0	34633378
Chr3	0	23337010
Chr4	0	23505795
Chr5	0	21845566
Chr6	0	22087265
Chr7	0	19545706
Chr8	0	19018769
Chr9	0	18789394
Chr10	0	17805028
Chr11	0	16737237
Chr12	0	17029177
Chr13	0	16438865
Chr14	0	14183503
Type	Shape	Chr	Start	End	color
DA	box	Chr1	6014372	6016021	FF5959
DA	box	Chr1	6244198	6245847	FF5959
DA	box	Chr1	797835	796198	FF5959
DA	box	Chr1	805010	803373	FF5959
DA	box	Chr3	3582293	3583939	FF5959
DA	box	Chr3	3609926	3611551	FF5959
DA	box	Chr3	3657631	3659256	FF5959
DA	box	Chr7	2104077	2105696	FF5959
DA	box	Chr7	2115289	2116908	FF5959
DA	box	Chr8	18430018	18431610	FF5959
DA	box	Chr8	12691198	12689546	FF5959
DA	box	Chr8	18242970	18241360	FF5959
DA	box	Chr8	18254397	18252781	FF5959
OC	circle	Chr1	22374021	22372384	ffd700
OC	circle	Chr8	17720466	17721887	ffd700
OC	circle	Chr13	15455484	15456875	ffd700
OC	circle	Chr13	15472544	15474148	ffd700
OC	circle	Chr13	15618863	15620122	ffd700
OC	circle	Chr13	15644086	15645690	ffd700
OC	circle	Chr13	15674561	15675976	ffd700
OC	circle	Chr13	15707068	15708675	ffd700
DS	circle	Chr6	4048616	4050256	006B0C
DS	circle	Chr6	4060916	4062556	006B0C
DS	circle	Chr6	4142116	4143753	006B0C
DS	circle	Chr6	4181249	4182886	006B0C
DS	circle	Chr1	60278621	60280258	006B0C
DS	circle	Chr1	60286237	60287874	006B0C
DS	circle	Chr1	60317150	60318793	006B0C
DS	circle	Chr1	26549361	26547724	006B0C
DS	circle	Chr1	60343200	60341563	006B0C
DS	circle	Chr1	60390552	60388915	006B0C
DS	circle	Chr2	27091154	27089517	006B0C
DS	circle	Chr2	27118494	27116857	006B0C
DS	circle	Chr2	27125617	27123977	006B0C
DS	circle	Chr2	8581872	8580226	006B0C
DS	circle	Chr2	8638350	8636707	006B0C
DS	circle	Chr3	14818216	14819844	006B0C
DS	circle	Chr5	2809731	2808124	006B0C
DS	circle	Chr5	2836066	2834627	006B0C
DS	circle	Chr5	2871118	2869973	006B0C
DS	circle	Chr5	2902344	2900728	006B0C
DS	circle	Chr8	9850499	9848868	006B0C
DS	circle	Chr13	5773303	5771657	006B0C

## Sheet: SI.Fig12c
AtBBE15
NC_003071.7	RefSeq	gene	14673840	14677398	.	-	.	ID=gene-AT2G34790;Dbxref=Araport:AT2G34790,TAIR:AT2G34790,GeneID:818044;Name=MEE23;gbkey=Gene;gene=MEE23;gene_biotype=protein_coding;gene_synonym=EDA28,EMBRYO SAC DEVELOPMENT ARREST 28,F19I3.2,F19I3_2,MATERNAL EFFECT EMBRYO ARREST 23;locus_tag=AT2G34790
NC_003071.7	RefSeq	mRNA	14673840	14677398	.	-	.	ID=rna-NM_129032.5;Parent=gene-AT2G34790;Dbxref=TAIR:AT2G34790,GeneID:818044,GenBank:NM_129032.5,Araport:AT2G34790;Name=NM_129032.5;gbkey=mRNA;gene=MEE23;inference=similar to RNA sequence%2C mRNA:INSD:BT004022.1%2CINSD:BT005187.1;locus_tag=AT2G34790;orig_protein_id=gnl|JCVI|AT2G34790.1;orig_transcript_id=gnl|JCVI|mRNA.AT2G34790.1;product=FAD-binding Berberine family protein;transcript_id=NM_12903…
NC_003071.7	RefSeq	exon	14676747	14677398	.	-	.	ID=exon-NM_129032.5-1;Parent=rna-NM_129032.5;Dbxref=TAIR:AT2G34790,GeneID:818044,GenBank:NM_129032.5,Araport:AT2G34790;gbkey=mRNA;gene=MEE23;inference=similar to RNA sequence%2C mRNA:INSD:BT004022.1%2CINSD:BT005187.1;locus_tag=AT2G34790;orig_protein_id=gnl|JCVI|AT2G34790.1;orig_transcript_id=gnl|JCVI|mRNA.AT2G34790.1;product=FAD-binding Berberine family protein;transcript_id=NM_129032.5
NC_003071.7	RefSeq	exon	14674732	14675218	.	-	.	ID=exon-NM_129032.5-2;Parent=rna-NM_129032.5;Dbxref=TAIR:AT2G34790,GeneID:818044,GenBank:NM_129032.5,Araport:AT2G34790;gbkey=mRNA;gene=MEE23;inference=similar to RNA sequence%2C mRNA:INSD:BT004022.1%2CINSD:BT005187.1;locus_tag=AT2G34790;orig_protein_id=gnl|JCVI|AT2G34790.1;orig_transcript_id=gnl|JCVI|mRNA.AT2G34790.1;product=FAD-binding Berberine family protein;transcript_id=NM_129032.5
NC_003071.7	RefSeq	exon	14673840	14674618	.	-	.	ID=exon-NM_129032.5-3;Parent=rna-NM_129032.5;Dbxref=TAIR:AT2G34790,GeneID:818044,GenBank:NM_129032.5,Araport:AT2G34790;gbkey=mRNA;gene=MEE23;inference=similar to RNA sequence%2C mRNA:INSD:BT004022.1%2CINSD:BT005187.1;locus_tag=AT2G34790;orig_protein_id=gnl|JCVI|AT2G34790.1;orig_transcript_id=gnl|JCVI|mRNA.AT2G34790.1;product=FAD-binding Berberine family protein;transcript_id=NM_129032.5
NC_003071.7	RefSeq	CDS	14676747	14677237	.	-	0	ID=cds-NP_181025.1;Parent=rna-NM_129032.5;Dbxref=Araport:AT2G34790,TAIR:AT2G34790,GeneID:818044,GenBank:NP_181025.1;Name=NP_181025.1;Note=MATERNAL EFFECT EMBRYO ARREST 23 (MEE23)%3B FUNCTIONS IN: electron carrier activity%2C oxidoreductase activity%2C FAD binding%2C catalytic activity%3B INVOLVED IN: polar nucleus fusion%2C embryo development ending in seed dormancy%3B LOCATED IN: cell wall%3B EX…
NC_003071.7	RefSeq	CDS	14674732	14675218	.	-	1	ID=cds-NP_181025.1;Parent=rna-NM_129032.5;Dbxref=Araport:AT2G34790,TAIR:AT2G34790,GeneID:818044,GenBank:NP_181025.1;Name=NP_181025.1;Note=MATERNAL EFFECT EMBRYO ARREST 23 (MEE23)%3B FUNCTIONS IN: electron carrier activity%2C oxidoreductase activity%2C FAD binding%2C catalytic activity%3B INVOLVED IN: polar nucleus fusion%2C embryo development ending in seed dormancy%3B LOCATED IN: cell wall%3B EX…
NC_003071.7	RefSeq	CDS	14673998	14674618	.	-	0	ID=cds-NP_181025.1;Parent=rna-NM_129032.5;Dbxref=Araport:AT2G34790,TAIR:AT2G34790,GeneID:818044,GenBank:NP_181025.1;Name=NP_181025.1;Note=MATERNAL EFFECT EMBRYO ARREST 23 (MEE23)%3B FUNCTIONS IN: electron carrier activity%2C oxidoreductase activity%2C FAD binding%2C catalytic activity%3B INVOLVED IN: polar nucleus fusion%2C embryo development ending in seed dormancy%3B LOCATED IN: cell wall%3B EX…
AtBBE28
NC_003076.8	RefSeq	gene	17910480	17912643	.	-	.	ID=gene-AT5G44440;Dbxref=Araport:AT5G44440,TAIR:AT5G44440,GeneID:834471;Name=AT5G44440;gbkey=Gene;gene_biotype=protein_coding;gene_synonym=MFC16.10,MFC16_10;locus_tag=AT5G44440
NC_003076.8	RefSeq	mRNA	17910480	17912312	.	-	.	ID=rna-NM_123811.3;Parent=gene-AT5G44440;Dbxref=TAIR:AT5G44440,GeneID:834471,GenBank:NM_123811.3,Araport:AT5G44440;Name=NM_123811.3;gbkey=mRNA;inference=similar to RNA sequence%2C mRNA:INSD:BT008866.1%2CINSD:BT003336.1;locus_tag=AT5G44440;orig_protein_id=gnl|JCVI|AT5G44440.1;orig_transcript_id=gnl|JCVI|mRNA.AT5G44440.1;product=FAD-binding Berberine family protein;transcript_id=NM_123811.3
NC_003076.8	RefSeq	exon	17910480	17912312	.	-	.	ID=exon-NM_123811.3-1;Parent=rna-NM_123811.3;Dbxref=TAIR:AT5G44440,GeneID:834471,GenBank:NM_123811.3,Araport:AT5G44440;gbkey=mRNA;inference=similar to RNA sequence%2C mRNA:INSD:BT008866.1%2CINSD:BT003336.1;locus_tag=AT5G44440;orig_protein_id=gnl|JCVI|AT5G44440.1;orig_transcript_id=gnl|JCVI|mRNA.AT5G44440.1;product=FAD-binding Berberine family protein;transcript_id=NM_123811.3
NC_003076.8	RefSeq	CDS	17910694	17912295	.	-	0	ID=cds-NP_199257.1;Parent=rna-NM_123811.3;Dbxref=TAIR:AT5G44440,GeneID:834471,GenBank:NP_199257.1,Araport:AT5G44440;Name=NP_199257.1;Note=FAD-binding Berberine family protein%3B FUNCTIONS IN: electron carrier activity%2C oxidoreductase activity%2C FAD binding%2C catalytic activity%3B LOCATED IN: endomembrane system%3B EXPRESSED IN: petal%2C embryo%2C sepal%2C pedicel%2C flower%3B EXPRESSED DURING…
AtBBE10
NC_003070.9	RefSeq	gene	10897925	10899975	.	+	.	ID=gene-AT1G30720;Dbxref=Araport:AT1G30720,TAIR:AT1G30720,GeneID:839952;Name=AT1G30720;gbkey=Gene;gene_biotype=protein_coding;gene_synonym=T5I8.17,T5I8_17;locus_tag=AT1G30720
NC_003070.9	RefSeq	mRNA	10897925	10899975	.	+	.	ID=rna-NM_102808.4;Parent=gene-AT1G30720;Dbxref=Araport:AT1G30720,TAIR:AT1G30720,GeneID:839952,GenBank:NM_102808.4;Name=NM_102808.4;gbkey=mRNA;inference=similar to RNA sequence%2C mRNA:INSD:BX815129.1%2CINSD:AF370619.1%2CINSD:AK117684.1;locus_tag=AT1G30720;orig_protein_id=gnl|JCVI|AT1G30720.1;orig_transcript_id=gnl|JCVI|mRNA.AT1G30720.1;product=FAD-binding Berberine family protein;transcript_id=N…
NC_003070.9	RefSeq	exon	10897925	10899975	.	+	.	ID=exon-NM_102808.4-1;Parent=rna-NM_102808.4;Dbxref=Araport:AT1G30720,TAIR:AT1G30720,GeneID:839952,GenBank:NM_102808.4;gbkey=mRNA;inference=similar to RNA sequence%2C mRNA:INSD:BX815129.1%2CINSD:AF370619.1%2CINSD:AK117684.1;locus_tag=AT1G30720;orig_protein_id=gnl|JCVI|AT1G30720.1;orig_transcript_id=gnl|JCVI|mRNA.AT1G30720.1;product=FAD-binding Berberine family protein;transcript_id=NM_102808.4
NC_003070.9	RefSeq	CDS	10898197	10899780	.	+	0	ID=cds-NP_174359.1;Parent=rna-NM_102808.4;Dbxref=Araport:AT1G30720,TAIR:AT1G30720,GeneID:839952,GenBank:NP_174359.1;Name=NP_174359.1;Note=FAD-binding Berberine family protein%3B FUNCTIONS IN: electron carrier activity%2C oxidoreductase activity%2C FAD binding%2C catalytic activity%3B LOCATED IN: endomembrane system%3B CONTAINS InterPro DOMAIN/s: FAD-binding%2C type 2 (InterPro:IPR016166)%2C Berbe…
AtBBE26
NC_003076.8	RefSeq	gene	17886160	17888530	.	-	.	ID=gene-AT5G44400;Dbxref=Araport:AT5G44400,TAIR:AT5G44400,GeneID:834466;Name=AT5G44400;gbkey=Gene;gene_biotype=protein_coding;gene_synonym=K9L2.20,K9L2_20;locus_tag=AT5G44400
NC_003076.8	RefSeq	mRNA	17886160	17888530	.	-	.	ID=rna-NM_123807.4;Parent=gene-AT5G44400;Dbxref=TAIR:AT5G44400,GeneID:834466,GenBank:NM_123807.4,Araport:AT5G44400;Name=NM_123807.4;gbkey=mRNA;inference=similar to RNA sequence%2C mRNA:INSD:AY072198.1;locus_tag=AT5G44400;orig_protein_id=gnl|JCVI|AT5G44400.1;orig_transcript_id=gnl|JCVI|mRNA.AT5G44400.1;product=FAD-binding Berberine family protein;transcript_id=NM_123807.4
NC_003076.8	RefSeq	exon	17888399	17888530	.	-	.	ID=exon-NM_123807.4-1;Parent=rna-NM_123807.4;Dbxref=TAIR:AT5G44400,GeneID:834466,GenBank:NM_123807.4,Araport:AT5G44400;gbkey=mRNA;inference=similar to RNA sequence%2C mRNA:INSD:AY072198.1;locus_tag=AT5G44400;orig_protein_id=gnl|JCVI|AT5G44400.1;orig_transcript_id=gnl|JCVI|mRNA.AT5G44400.1;product=FAD-binding Berberine family protein;transcript_id=NM_123807.4
NC_003076.8	RefSeq	exon	17887575	17888134	.	-	.	ID=exon-NM_123807.4-2;Parent=rna-NM_123807.4;Dbxref=TAIR:AT5G44400,GeneID:834466,GenBank:NM_123807.4,Araport:AT5G44400;gbkey=mRNA;inference=similar to RNA sequence%2C mRNA:INSD:AY072198.1;locus_tag=AT5G44400;orig_protein_id=gnl|JCVI|AT5G44400.1;orig_transcript_id=gnl|JCVI|mRNA.AT5G44400.1;product=FAD-binding Berberine family protein;transcript_id=NM_123807.4
NC_003076.8	RefSeq	exon	17886160	17887481	.	-	.	ID=exon-NM_123807.4-3;Parent=rna-NM_123807.4;Dbxref=TAIR:AT5G44400,GeneID:834466,GenBank:NM_123807.4,Araport:AT5G44400;gbkey=mRNA;inference=similar to RNA sequence%2C mRNA:INSD:AY072198.1;locus_tag=AT5G44400;orig_protein_id=gnl|JCVI|AT5G44400.1;orig_transcript_id=gnl|JCVI|mRNA.AT5G44400.1;product=FAD-binding Berberine family protein;transcript_id=NM_123807.4
NC_003076.8	RefSeq	CDS	17887575	17888071	.	-	0	ID=cds-NP_199253.1;Parent=rna-NM_123807.4;Dbxref=TAIR:AT5G44400,GeneID:834466,GenBank:NP_199253.1,Araport:AT5G44400;Name=NP_199253.1;Note=FAD-binding Berberine family protein%3B FUNCTIONS IN: electron carrier activity%2C oxidoreductase activity%2C FAD binding%2C catalytic activity%3B LOCATED IN: cell wall%3B EXPRESSED IN: 18 plant structures%3B EXPRESSED DURING: 10 growth stages%3B CONTAINS Inter…
NC_003076.8	RefSeq	CDS	17886365	17887481	.	-	1	ID=cds-NP_199253.1;Parent=rna-NM_123807.4;Dbxref=TAIR:AT5G44400,GeneID:834466,GenBank:NP_199253.1,Araport:AT5G44400;Name=NP_199253.1;Note=FAD-binding Berberine family protein%3B FUNCTIONS IN: electron carrier activity%2C oxidoreductase activity%2C FAD binding%2C catalytic activity%3B LOCATED IN: cell wall%3B EXPRESSED IN: 18 plant structures%3B EXPRESSED DURING: 10 growth stages%3B CONTAINS Inter…
AtBBE21
NC_003075.7	RefSeq	gene	11157916	11159867	.	+	.	ID=gene-AT4G20840;Dbxref=Araport:AT4G20840,TAIR:AT4G20840,GeneID:827832;Name=AT4G20840;gbkey=Gene;gene_biotype=protein_coding;gene_synonym=F21C20.190,F21C20_190;locus_tag=AT4G20840;partial=true;start_range=.,11157916
NC_003075.7	RefSeq	mRNA	11157916	11159867	.	+	.	ID=rna-NM_118202.2;Parent=gene-AT4G20840;Dbxref=TAIR:AT4G20840,GeneID:827832,GenBank:NM_118202.2,Araport:AT4G20840;Name=NM_118202.2;gbkey=mRNA;inference=Similar to RNA sequence%2C mRNA:INSD:AY062595.1%2CINSD:BX827154.1;locus_tag=AT4G20840;orig_protein_id=gnl|JCVI|AT4G20840.1;orig_transcript_id=gnl|JCVI|mRNA.AT4G20840.1;partial=true;product=FAD-binding Berberine family protein;start_range=.,111579…
NC_003075.7	RefSeq	exon	11157916	11159867	.	+	.	ID=exon-NM_118202.2-1;Parent=rna-NM_118202.2;Dbxref=TAIR:AT4G20840,GeneID:827832,GenBank:NM_118202.2,Araport:AT4G20840;gbkey=mRNA;inference=Similar to RNA sequence%2C mRNA:INSD:AY062595.1%2CINSD:BX827154.1;locus_tag=AT4G20840;orig_protein_id=gnl|JCVI|AT4G20840.1;orig_transcript_id=gnl|JCVI|mRNA.AT4G20840.1;partial=true;product=FAD-binding Berberine family protein;start_range=.,11157916;transcript…
NC_003075.7	RefSeq	CDS	11157916	11159535	.	+	0	ID=cds-NP_193816.1;Parent=rna-NM_118202.2;Dbxref=TAIR:AT4G20840,GeneID:827832,GenBank:NP_193816.1,Araport:AT4G20840;Name=NP_193816.1;Note=FAD-binding Berberine family protein%3B FUNCTIONS IN: electron carrier activity%2C oxidoreductase activity%2C FAD binding%2C catalytic activity%3B LOCATED IN: apoplast%2C plasma membrane%3B EXPRESSED IN: 21 plant structures%3B EXPRESSED DURING: 10 growth stages…
AtBBE5
NC_003070.9	RefSeq	gene	9133291	9134874	.	-	.	ID=gene-AT1G26400;Dbxref=Araport:AT1G26400,TAIR:AT1G26400,GeneID:839182;Name=AT1G26400;end_range=9134874,.;gbkey=Gene;gene_biotype=protein_coding;gene_synonym=T1K7.22,T1K7_22;locus_tag=AT1G26400;partial=true;start_range=.,9133291
NC_003070.9	RefSeq	mRNA	9133291	9134874	.	-	.	ID=rna-NM_102404.1;Parent=gene-AT1G26400;Dbxref=Araport:AT1G26400,TAIR:AT1G26400,GeneID:839182,GenBank:NM_102404.1;Name=NM_102404.1;end_range=9134874,.;gbkey=mRNA;locus_tag=AT1G26400;orig_protein_id=gnl|JCVI|AT1G26400.1;orig_transcript_id=gnl|JCVI|mRNA.AT1G26400.1;partial=true;product=FAD-binding Berberine family protein;start_range=.,9133291;transcript_id=NM_102404.1
NC_003070.9	RefSeq	exon	9133291	9134874	.	-	.	ID=exon-NM_102404.1-1;Parent=rna-NM_102404.1;Dbxref=Araport:AT1G26400,TAIR:AT1G26400,GeneID:839182,GenBank:NM_102404.1;end_range=9134874,.;gbkey=mRNA;locus_tag=AT1G26400;orig_protein_id=gnl|JCVI|AT1G26400.1;orig_transcript_id=gnl|JCVI|mRNA.AT1G26400.1;partial=true;product=FAD-binding Berberine family protein;start_range=.,9133291;transcript_id=NM_102404.1
NC_003070.9	RefSeq	CDS	9133291	9134874	.	-	0	ID=cds-NP_173964.1;Parent=rna-NM_102404.1;Dbxref=Araport:AT1G26400,TAIR:AT1G26400,GeneID:839182,GenBank:NP_173964.1;Name=NP_173964.1;Note=FAD-binding Berberine family protein%3B FUNCTIONS IN: electron carrier activity%2C oxidoreductase activity%2C FAD binding%2C catalytic activity%3B LOCATED IN: endomembrane system%3B CONTAINS InterPro DOMAIN/s: FAD-binding%2C type 2 (InterPro:IPR016166)%2C Berbe…
AtBBE3
NC_003070.9	RefSeq	gene	9126737	9128568	.	-	.	ID=gene-AT1G26380;Dbxref=Araport:AT1G26380,TAIR:AT1G26380,GeneID:839180;Name=AT1G26380;gbkey=Gene;gene_biotype=protein_coding;gene_synonym=T1K7.24,T1K7_24;locus_tag=AT1G26380
NC_003070.9	RefSeq	mRNA	9126737	9128568	.	-	.	ID=rna-NM_102402.4;Parent=gene-AT1G26380;Dbxref=Araport:AT1G26380,TAIR:AT1G26380,GeneID:839180,GenBank:NM_102402.4;Name=NM_102402.4;gbkey=mRNA;inference=similar to RNA sequence%2C mRNA:INSD:AY113892.1%2CINSD:AF360332.1%2CINSD:BX814996.1;locus_tag=AT1G26380;orig_protein_id=gnl|JCVI|AT1G26380.1;orig_transcript_id=gnl|JCVI|mRNA.AT1G26380.1;product=FAD-binding Berberine family protein;transcript_id=N…
NC_003070.9	RefSeq	exon	9126737	9128568	.	-	.	ID=exon-NM_102402.4-1;Parent=rna-NM_102402.4;Dbxref=Araport:AT1G26380,TAIR:AT1G26380,GeneID:839180,GenBank:NM_102402.4;gbkey=mRNA;inference=similar to RNA sequence%2C mRNA:INSD:AY113892.1%2CINSD:AF360332.1%2CINSD:BX814996.1;locus_tag=AT1G26380;orig_protein_id=gnl|JCVI|AT1G26380.1;orig_transcript_id=gnl|JCVI|mRNA.AT1G26380.1;product=FAD-binding Berberine family protein;transcript_id=NM_102402.4
NC_003070.9	RefSeq	CDS	9126901	9128508	.	-	0	ID=cds-NP_564244.1;Parent=rna-NM_102402.4;Dbxref=Araport:AT1G26380,TAIR:AT1G26380,GeneID:839180,GenBank:NP_564244.1;Name=NP_564244.1;Note=FAD-binding Berberine family protein%3B FUNCTIONS IN: electron carrier activity%2C oxidoreductase activity%2C FAD binding%2C catalytic activity%3B LOCATED IN: endomembrane system%3B EXPRESSED IN: 9 plant structures%3B EXPRESSED DURING: LP.06 six leaves visible%…
AtBBE2
NC_003070.9	RefSeq	gene	3975607	3977379	.	+	.	ID=gene-AT1G11770;Dbxref=Araport:AT1G11770,TAIR:AT1G11770,GeneID:837722;Name=AT1G11770;gbkey=Gene;gene_biotype=protein_coding;gene_synonym=F25C20.7,F25C20_7;locus_tag=AT1G11770;partial=true;start_range=.,3975607
NC_003070.9	RefSeq	mRNA	3975679	3977379	.	+	.	ID=rna-NM_101049.3;Parent=gene-AT1G11770;Dbxref=Araport:AT1G11770,TAIR:AT1G11770,GeneID:837722,GenBank:NM_101049.3;Name=NM_101049.3;gbkey=mRNA;inference=similar to RNA sequence%2C mRNA:INSD:BX814219.1%2CINSD:AK118171.1;locus_tag=AT1G11770;orig_protein_id=gnl|JCVI|AT1G11770.1;orig_transcript_id=gnl|JCVI|mRNA.AT1G11770.1;partial=true;product=FAD-binding Berberine family protein;start_range=.,397567…
NC_003070.9	RefSeq	exon	3975679	3977379	.	+	.	ID=exon-NM_101049.3-1;Parent=rna-NM_101049.3;Dbxref=Araport:AT1G11770,TAIR:AT1G11770,GeneID:837722,GenBank:NM_101049.3;gbkey=mRNA;inference=similar to RNA sequence%2C mRNA:INSD:BX814219.1%2CINSD:AK118171.1;locus_tag=AT1G11770;orig_protein_id=gnl|JCVI|AT1G11770.1;orig_transcript_id=gnl|JCVI|mRNA.AT1G11770.1;partial=true;product=FAD-binding Berberine family protein;start_range=.,3975679;transcript_…
NC_003070.9	RefSeq	CDS	3975679	3977289	.	+	0	ID=cds-NP_172642.3;Parent=rna-NM_101049.3;Dbxref=Araport:AT1G11770,TAIR:AT1G11770,GeneID:837722,GenBank:NP_172642.3;Name=NP_172642.3;Note=FAD-binding Berberine family protein%3B FUNCTIONS IN: electron carrier activity%2C oxidoreductase activity%2C FAD binding%2C catalytic activity%3B LOCATED IN: endomembrane system%3B EXPRESSED IN: 9 plant structures%3B EXPRESSED DURING: L mature pollen stage%2C …
AtBBE1
NC_003070.9	RefSeq	gene	340108	342040	.	-	.	ID=gene-AT1G01980;Dbxref=Araport:AT1G01980,TAIR:AT1G01980,GeneID:839296;Name=AT1G01980;Note=member of Reticuline oxidase-like family;gbkey=Gene;gene_biotype=protein_coding;gene_synonym=F22M8.11,F22M8_11,SEC1A,SIMILAR TO ELECTRON CAREER 1A;locus_tag=AT1G01980
NC_003070.9	RefSeq	mRNA	340108	342040	.	-	.	ID=rna-NM_100078.3;Parent=gene-AT1G01980;Dbxref=Araport:AT1G01980,TAIR:AT1G01980,GeneID:839296,GenBank:NM_100078.3;Name=NM_100078.3;gbkey=mRNA;inference=similar to RNA sequence%2C mRNA:INSD:AK220962.1;locus_tag=AT1G01980;orig_protein_id=gnl|JCVI|AT1G01980.1;orig_transcript_id=gnl|JCVI|mRNA.AT1G01980.1;product=FAD-binding Berberine family protein;transcript_id=NM_100078.3
NC_003070.9	RefSeq	exon	340108	342040	.	-	.	ID=exon-NM_100078.3-1;Parent=rna-NM_100078.3;Dbxref=Araport:AT1G01980,TAIR:AT1G01980,GeneID:839296,GenBank:NM_100078.3;gbkey=mRNA;inference=similar to RNA sequence%2C mRNA:INSD:AK220962.1;locus_tag=AT1G01980;orig_protein_id=gnl|JCVI|AT1G01980.1;orig_transcript_id=gnl|JCVI|mRNA.AT1G01980.1;product=FAD-binding Berberine family protein;transcript_id=NM_100078.3
NC_003070.9	RefSeq	CDS	340374	341999	.	-	0	ID=cds-NP_171700.1;Parent=rna-NM_100078.3;Dbxref=Araport:AT1G01980,TAIR:AT1G01980,GeneID:839296,GenBank:NP_171700.1;Name=NP_171700.1;Note=ATSEC1A%3B FUNCTIONS IN: electron carrier activity%2C oxidoreductase activity%2C FAD binding%2C catalytic activity%3B LOCATED IN: endomembrane system%3B EXPRESSED IN: 9 plant structures%3B EXPRESSED DURING: L mature pollen stage%2C M germinated pollen stage%2C …
AtBBE14
NC_003070.9	RefSeq	gene	12657027	12658756	.	-	.	ID=gene-AT1G34575;Dbxref=Araport:AT1G34575,TAIR:AT1G34575,GeneID:840361;Name=AT1G34575;gbkey=Gene;gene_biotype=protein_coding;locus_tag=AT1G34575
NC_003070.9	RefSeq	mRNA	12657027	12658756	.	-	.	ID=rna-NM_103181.2;Parent=gene-AT1G34575;Dbxref=Araport:AT1G34575,TAIR:AT1G34575,GeneID:840361,GenBank:NM_103181.2;Name=NM_103181.2;gbkey=mRNA;locus_tag=AT1G34575;orig_protein_id=gnl|JCVI|AT1G34575.1;orig_transcript_id=gnl|JCVI|mRNA.AT1G34575.1;product=FAD-binding Berberine family protein;transcript_id=NM_103181.2
NC_003070.9	RefSeq	exon	12657027	12658756	.	-	.	ID=exon-NM_103181.2-1;Parent=rna-NM_103181.2;Dbxref=Araport:AT1G34575,TAIR:AT1G34575,GeneID:840361,GenBank:NM_103181.2;gbkey=mRNA;locus_tag=AT1G34575;orig_protein_id=gnl|JCVI|AT1G34575.1;orig_transcript_id=gnl|JCVI|mRNA.AT1G34575.1;product=FAD-binding Berberine family protein;transcript_id=NM_103181.2
NC_003070.9	RefSeq	CDS	12657149	12658732	.	-	0	ID=cds-NP_564449.1;Parent=rna-NM_103181.2;Dbxref=Araport:AT1G34575,TAIR:AT1G34575,GeneID:840361,GenBank:NP_564449.1;Name=NP_564449.1;Note=FAD-binding Berberine family protein%3B FUNCTIONS IN: electron carrier activity%2C oxidoreductase activity%2C FAD binding%2C catalytic activity%3B LOCATED IN: endomembrane system%3B CONTAINS InterPro DOMAIN/s: FAD-binding%2C type 2 (InterPro:IPR016166)%2C Berbe…
AtBBE19
NC_003075.7	RefSeq	gene	11155453	11157806	.	+	.	ID=gene-AT4G20830;Dbxref=Araport:AT4G20830,TAIR:AT4G20830,GeneID:827831;Name=AT4G20830;gbkey=Gene;gene_biotype=protein_coding;gene_synonym=F21C20.180,F21C20_180;locus_tag=AT4G20830
NC_003075.7	RefSeq	mRNA	11155453	11157806	.	+	.	ID=rna-NM_118201.3;Parent=gene-AT4G20830;Dbxref=TAIR:AT4G20830,GeneID:827831,GenBank:NM_118201.3,Araport:AT4G20830;Name=NM_118201.3;gbkey=mRNA;inference=Similar to RNA sequence%2C mRNA:INSD:AF083756.1%2CINSD:BX827481.1;locus_tag=AT4G20830;orig_protein_id=gnl|JCVI|AT4G20830.1;orig_transcript_id=gnl|JCVI|mRNA.AT4G20830.1;product=FAD-binding Berberine family protein;transcript_id=NM_118201.3
NC_003075.7	RefSeq	exon	11155453	11157097	.	+	.	ID=exon-NM_118201.3-1;Parent=rna-NM_118201.3;Dbxref=TAIR:AT4G20830,GeneID:827831,GenBank:NM_118201.3,Araport:AT4G20830;gbkey=mRNA;inference=Similar to RNA sequence%2C mRNA:INSD:AF083756.1%2CINSD:BX827481.1;locus_tag=AT4G20830;orig_protein_id=gnl|JCVI|AT4G20830.1;orig_transcript_id=gnl|JCVI|mRNA.AT4G20830.1;product=FAD-binding Berberine family protein;transcript_id=NM_118201.3
NC_003075.7	RefSeq	exon	11157477	11157806	.	+	.	ID=exon-NM_118201.3-2;Parent=rna-NM_118201.3;Dbxref=TAIR:AT4G20830,GeneID:827831,GenBank:NM_118201.3,Araport:AT4G20830;gbkey=mRNA;inference=Similar to RNA sequence%2C mRNA:INSD:AF083756.1%2CINSD:BX827481.1;locus_tag=AT4G20830;orig_protein_id=gnl|JCVI|AT4G20830.1;orig_transcript_id=gnl|JCVI|mRNA.AT4G20830.1;product=FAD-binding Berberine family protein;transcript_id=NM_118201.3
NC_003075.7	RefSeq	CDS	11155486	11157097	.	+	0	ID=cds-NP_193815.2;Parent=rna-NM_118201.3;Dbxref=TAIR:AT4G20830,GeneID:827831,GenBank:NP_193815.2,Araport:AT4G20830;Name=NP_193815.2;Note=FAD-binding Berberine family protein%3B FUNCTIONS IN: electron carrier activity%2C oxidoreductase activity%2C FAD binding%2C catalytic activity%3B INVOLVED IN: response to oxidative stress%3B LOCATED IN: mitochondrion%2C apoplast%2C plasma membrane%2C vacuole%2…
NC_003075.7	RefSeq	CDS	11157477	11157577	.	+	2	ID=cds-NP_193815.2;Parent=rna-NM_118201.3;Dbxref=TAIR:AT4G20830,GeneID:827831,GenBank:NP_193815.2,Araport:AT4G20830;Name=NP_193815.2;Note=FAD-binding Berberine family protein%3B FUNCTIONS IN: electron carrier activity%2C oxidoreductase activity%2C FAD binding%2C catalytic activity%3B INVOLVED IN: response to oxidative stress%3B LOCATED IN: mitochondrion%2C apoplast%2C plasma membrane%2C vacuole%2…
AtBBE22
NC_003075.7	RefSeq	gene	11172622	11174467	.	+	.	ID=gene-AT4G20860;Dbxref=Araport:AT4G20860,TAIR:AT4G20860,GeneID:827834;Name=AT4G20860;gbkey=Gene;gene_biotype=protein_coding;gene_synonym=T13K14.20,T13K14_20;locus_tag=AT4G20860
NC_003075.7	RefSeq	mRNA	11172622	11174467	.	+	.	ID=rna-NM_118204.2;Parent=gene-AT4G20860;Dbxref=TAIR:AT4G20860,GeneID:827834,GenBank:NM_118204.2,Araport:AT4G20860;Name=NM_118204.2;gbkey=mRNA;inference=Similar to RNA sequence%2C mRNA:INSD:AK221267.1%2CINSD:AY133616.1%2CINSD:AF367269.1%2C INSD:AF083692.1;locus_tag=AT4G20860;orig_protein_id=gnl|JCVI|AT4G20860.1;orig_transcript_id=gnl|JCVI|mRNA.AT4G20860.1;product=FAD-binding Berberine family prot…
NC_003075.7	RefSeq	exon	11172622	11174467	.	+	.	ID=exon-NM_118204.2-1;Parent=rna-NM_118204.2;Dbxref=TAIR:AT4G20860,GeneID:827834,GenBank:NM_118204.2,Araport:AT4G20860;gbkey=mRNA;inference=Similar to RNA sequence%2C mRNA:INSD:AK221267.1%2CINSD:AY133616.1%2CINSD:AF367269.1%2C INSD:AF083692.1;locus_tag=AT4G20860;orig_protein_id=gnl|JCVI|AT4G20860.1;orig_transcript_id=gnl|JCVI|mRNA.AT4G20860.1;product=FAD-binding Berberine family protein;transcrip…
NC_003075.7	RefSeq	CDS	11172726	11174318	.	+	0	ID=cds-NP_193818.1;Parent=rna-NM_118204.2;Dbxref=TAIR:AT4G20860,GeneID:827834,GenBank:NP_193818.1,Araport:AT4G20860;Name=NP_193818.1;Note=FAD-binding Berberine family protein%3B FUNCTIONS IN: electron carrier activity%2C oxidoreductase activity%2C FAD binding%2C catalytic activity%3B INVOLVED IN: response to cyclopentenone%3B LOCATED IN: endomembrane system%3B EXPRESSED IN: 10 plant structures%3B…
AtBBE12
NC_003070.9	RefSeq	gene	10902995	10904739	.	+	.	ID=gene-AT1G30740;Dbxref=Araport:AT1G30740,TAIR:AT1G30740,GeneID:839954;Name=AT1G30740;end_range=10904739,.;gbkey=Gene;gene_biotype=protein_coding;gene_synonym=T5I8.19,T5I8_19;locus_tag=AT1G30740;partial=true
NC_003070.9	RefSeq	mRNA	10902995	10904739	.	+	.	ID=rna-NM_001332921.1;Parent=gene-AT1G30740;Dbxref=Araport:AT1G30740,GeneID:839954,GenBank:NM_001332921.1,TAIR:AT1G30740;Name=NM_001332921.1;gbkey=mRNA;locus_tag=AT1G30740;orig_protein_id=gnl|JCVI|AT1G30740.2;orig_transcript_id=gnl|JCVI|mRNA.AT1G30740.2;product=FAD-binding Berberine family protein;transcript_id=NM_001332921.1
NC_003070.9	RefSeq	exon	10902995	10904739	.	+	.	ID=exon-NM_001332921.1-1;Parent=rna-NM_001332921.1;Dbxref=Araport:AT1G30740,GeneID:839954,GenBank:NM_001332921.1,TAIR:AT1G30740;gbkey=mRNA;locus_tag=AT1G30740;orig_protein_id=gnl|JCVI|AT1G30740.2;orig_transcript_id=gnl|JCVI|mRNA.AT1G30740.2;product=FAD-binding Berberine family protein;transcript_id=NM_001332921.1
NC_003070.9	RefSeq	CDS	10903020	10904630	.	+	0	ID=cds-NP_001322315.1;Parent=rna-NM_001332921.1;Dbxref=Araport:AT1G30740,GeneID:839954,GenBank:NP_001322315.1,TAIR:AT1G30740;Name=NP_001322315.1;gbkey=CDS;locus_tag=AT1G30740;orig_transcript_id=gnl|JCVI|mRNA.AT1G30740.2;product=FAD-binding Berberine family protein;protein_id=NP_001322315.1
AtCKX
NC_003076.8	RefSeq	gene	7226606	7230304	.	+	.	ID=gene-AT5G21482;Dbxref=Araport:AT5G21482,TAIR:AT5G21482,GeneID:832248;Name=CKX7;Note=This gene used to be called AtCKX5. It encodes a protein whose sequence is similar to cytokinin oxidase/dehydrogenase%2C which catalyzes the degradation of cytokinins.;gbkey=Gene;gene=CKX7;gene_biotype=protein_coding;gene_synonym=ARABIDOPSIS THALIANA CYTOKININ OXIDASE 5,ATCKX5,cytokinin oxidase 7;locus_tag=AT5G…
NC_003076.8	RefSeq	mRNA	7226606	7230304	.	+	.	ID=rna-NM_180532.3;Parent=gene-AT5G21482;Dbxref=TAIR:AT5G21482,GeneID:832248,GenBank:NM_180532.3,Araport:AT5G21482;Name=NM_180532.3;gbkey=mRNA;gene=CKX7;inference=similar to RNA sequence%2C mRNA:INSD:BT002757.1%2CINSD:AY091158.1%2CINSD:AF303981.1;locus_tag=AT5G21482;orig_protein_id=gnl|JCVI|AT5G21482.1;orig_transcript_id=gnl|JCVI|mRNA.AT5G21482.1;product=cytokinin oxidase 7;transcript_id=NM_18053…
NC_003076.8	RefSeq	exon	7226606	7227564	.	+	.	ID=exon-NM_180532.3-1;Parent=rna-NM_180532.3;Dbxref=TAIR:AT5G21482,GeneID:832248,GenBank:NM_180532.3,Araport:AT5G21482;gbkey=mRNA;gene=CKX7;inference=similar to RNA sequence%2C mRNA:INSD:BT002757.1%2CINSD:AY091158.1%2CINSD:AF303981.1;locus_tag=AT5G21482;orig_protein_id=gnl|JCVI|AT5G21482.1;orig_transcript_id=gnl|JCVI|mRNA.AT5G21482.1;product=cytokinin oxidase 7;transcript_id=NM_180532.3
NC_003076.8	RefSeq	exon	7227681	7227956	.	+	.	ID=exon-NM_180532.3-2;Parent=rna-NM_180532.3;Dbxref=TAIR:AT5G21482,GeneID:832248,GenBank:NM_180532.3,Araport:AT5G21482;gbkey=mRNA;gene=CKX7;inference=similar to RNA sequence%2C mRNA:INSD:BT002757.1%2CINSD:AY091158.1%2CINSD:AF303981.1;locus_tag=AT5G21482;orig_protein_id=gnl|JCVI|AT5G21482.1;orig_transcript_id=gnl|JCVI|mRNA.AT5G21482.1;product=cytokinin oxidase 7;transcript_id=NM_180532.3
NC_003076.8	RefSeq	exon	7228738	7229000	.	+	.	ID=exon-NM_180532.3-3;Parent=rna-NM_180532.3;Dbxref=TAIR:AT5G21482,GeneID:832248,GenBank:NM_180532.3,Araport:AT5G21482;gbkey=mRNA;gene=CKX7;inference=similar to RNA sequence%2C mRNA:INSD:BT002757.1%2CINSD:AY091158.1%2CINSD:AF303981.1;locus_tag=AT5G21482;orig_protein_id=gnl|JCVI|AT5G21482.1;orig_transcript_id=gnl|JCVI|mRNA.AT5G21482.1;product=cytokinin oxidase 7;transcript_id=NM_180532.3
NC_003076.8	RefSeq	exon	7229740	7230304	.	+	.	ID=exon-NM_180532.3-4;Parent=rna-NM_180532.3;Dbxref=TAIR:AT5G21482,GeneID:832248,GenBank:NM_180532.3,Araport:AT5G21482;gbkey=mRNA;gene=CKX7;inference=similar to RNA sequence%2C mRNA:INSD:BT002757.1%2CINSD:AY091158.1%2CINSD:AF303981.1;locus_tag=AT5G21482;orig_protein_id=gnl|JCVI|AT5G21482.1;orig_transcript_id=gnl|JCVI|mRNA.AT5G21482.1;product=cytokinin oxidase 7;transcript_id=NM_180532.3
NC_003076.8	RefSeq	CDS	7226842	7227564	.	+	0	ID=cds-NP_850863.1;Parent=rna-NM_180532.3;Dbxref=TAIR:AT5G21482,GeneID:832248,GenBank:NP_850863.1,Araport:AT5G21482;Name=NP_850863.1;Note=cytokinin oxidase 7 (CKX7)%3B CONTAINS InterPro DOMAIN/s: Cytokinin dehydrogenase 1%2C FAD/cytokinin binding domain (InterPro:IPR015345)%2C FAD-binding%2C type 2 (InterPro:IPR016166)%2C FAD-linked oxidase-like%2C C-terminal (InterPro:IPR016164)%2C FAD linked ox…
NC_003076.8	RefSeq	CDS	7227681	7227956	.	+	0	ID=cds-NP_850863.1;Parent=rna-NM_180532.3;Dbxref=TAIR:AT5G21482,GeneID:832248,GenBank:NP_850863.1,Araport:AT5G21482;Name=NP_850863.1;Note=cytokinin oxidase 7 (CKX7)%3B CONTAINS InterPro DOMAIN/s: Cytokinin dehydrogenase 1%2C FAD/cytokinin binding domain (InterPro:IPR015345)%2C FAD-binding%2C type 2 (InterPro:IPR016166)%2C FAD-linked oxidase-like%2C C-terminal (InterPro:IPR016164)%2C FAD linked ox…
NC_003076.8	RefSeq	CDS	7228738	7229000	.	+	0	ID=cds-NP_850863.1;Parent=rna-NM_180532.3;Dbxref=TAIR:AT5G21482,GeneID:832248,GenBank:NP_850863.1,Araport:AT5G21482;Name=NP_850863.1;Note=cytokinin oxidase 7 (CKX7)%3B CONTAINS InterPro DOMAIN/s: Cytokinin dehydrogenase 1%2C FAD/cytokinin binding domain (InterPro:IPR015345)%2C FAD-binding%2C type 2 (InterPro:IPR016166)%2C FAD-linked oxidase-like%2C C-terminal (InterPro:IPR016164)%2C FAD linked ox…
NC_003076.8	RefSeq	CDS	7229740	7230052	.	+	1	ID=cds-NP_850863.1;Parent=rna-NM_180532.3;Dbxref=TAIR:AT5G21482,GeneID:832248,GenBank:NP_850863.1,Araport:AT5G21482;Name=NP_850863.1;Note=cytokinin oxidase 7 (CKX7)%3B CONTAINS InterPro DOMAIN/s: Cytokinin dehydrogenase 1%2C FAD/cytokinin binding domain (InterPro:IPR015345)%2C FAD-binding%2C type 2 (InterPro:IPR016166)%2C FAD-linked oxidase-like%2C C-terminal (InterPro:IPR016164)%2C FAD linked ox…
EasE
NC_007195.1	RefSeq	gene	4795721	4797842	.	+	.	ID=gene-AFUA_2G18050;Dbxref=GeneID:3512717;Name=AFUA_2G18050;end_range=4797842,.;gbkey=Gene;gene_biotype=protein_coding;locus_tag=AFUA_2G18050;old_locus_tag=Afu2g18050;partial=true;start_range=.,4795721
NC_007195.1	RefSeq	mRNA	4795721	4797842	.	+	.	ID=rna-XM_751049.1;Parent=gene-AFUA_2G18050;Dbxref=GeneID:3512717,Genbank:XM_751049.1;Name=XM_751049.1;Note=transcript AFUA_2G18050A;end_range=4797842,.;gbkey=mRNA;locus_tag=AFUA_2G18050;partial=true;product=FAD binding oxidoreductase CpoX1;start_range=.,4795721;transcript_id=XM_751049.1
NC_007195.1	RefSeq	exon	4795721	4795794	.	+	.	ID=exon-XM_751049.1-1;Parent=rna-XM_751049.1;Dbxref=GeneID:3512717,Genbank:XM_751049.1;Note=transcript AFUA_2G18050A;gbkey=mRNA;locus_tag=AFUA_2G18050;partial=true;product=FAD binding oxidoreductase CpoX1;start_range=.,4795721;transcript_id=XM_751049.1
NC_007195.1	RefSeq	exon	4795842	4796018	.	+	.	ID=exon-XM_751049.1-2;Parent=rna-XM_751049.1;Dbxref=GeneID:3512717,Genbank:XM_751049.1;Note=transcript AFUA_2G18050A;gbkey=mRNA;locus_tag=AFUA_2G18050;partial=true;product=FAD binding oxidoreductase CpoX1;transcript_id=XM_751049.1
NC_007195.1	RefSeq	exon	4796033	4796138	.	+	.	ID=exon-XM_751049.1-3;Parent=rna-XM_751049.1;Dbxref=GeneID:3512717,Genbank:XM_751049.1;Note=transcript AFUA_2G18050A;gbkey=mRNA;locus_tag=AFUA_2G18050;partial=true;product=FAD binding oxidoreductase CpoX1;transcript_id=XM_751049.1
NC_007195.1	RefSeq	exon	4796244	4796753	.	+	.	ID=exon-XM_751049.1-4;Parent=rna-XM_751049.1;Dbxref=GeneID:3512717,Genbank:XM_751049.1;Note=transcript AFUA_2G18050A;gbkey=mRNA;locus_tag=AFUA_2G18050;partial=true;product=FAD binding oxidoreductase CpoX1;transcript_id=XM_751049.1
NC_007195.1	RefSeq	exon	4796823	4797842	.	+	.	ID=exon-XM_751049.1-5;Parent=rna-XM_751049.1;Dbxref=GeneID:3512717,Genbank:XM_751049.1;Note=transcript AFUA_2G18050A;end_range=4797842,.;gbkey=mRNA;locus_tag=AFUA_2G18050;partial=true;product=FAD binding oxidoreductase CpoX1;transcript_id=XM_751049.1
NC_007195.1	RefSeq	CDS	4795721	4795794	.	+	0	ID=cds-XP_756142.1;Parent=rna-XM_751049.1;Dbxref=GeneID:3512717,Genbank:XP_756142.1;Name=XP_756142.1;Note=encoded by transcript AFUA_2G18050A~identical to oxidoreductase (GI:66853780) [Aspergillus fumigatus Af293] PMID: 15933009 similar to oxidoreductase (GI:4499843) [Claviceps purpurea] PMID: 10071219;gbkey=CDS;locus_tag=AFUA_2G18050;product=FAD binding oxidoreductase CpoX1;protein_id=XP_756142.1
NC_007195.1	RefSeq	CDS	4795842	4796018	.	+	1	ID=cds-XP_756142.1;Parent=rna-XM_751049.1;Dbxref=GeneID:3512717,Genbank:XP_756142.1;Name=XP_756142.1;Note=encoded by transcript AFUA_2G18050A~identical to oxidoreductase (GI:66853780) [Aspergillus fumigatus Af293] PMID: 15933009 similar to oxidoreductase (GI:4499843) [Claviceps purpurea] PMID: 10071219;gbkey=CDS;locus_tag=AFUA_2G18050;product=FAD binding oxidoreductase CpoX1;protein_id=XP_756142.1
NC_007195.1	RefSeq	CDS	4796033	4796138	.	+	1	ID=cds-XP_756142.1;Parent=rna-XM_751049.1;Dbxref=GeneID:3512717,Genbank:XP_756142.1;Name=XP_756142.1;Note=encoded by transcript AFUA_2G18050A~identical to oxidoreductase (GI:66853780) [Aspergillus fumigatus Af293] PMID: 15933009 similar to oxidoreductase (GI:4499843) [Claviceps purpurea] PMID: 10071219;gbkey=CDS;locus_tag=AFUA_2G18050;product=FAD binding oxidoreductase CpoX1;protein_id=XP_756142.1
NC_007195.1	RefSeq	CDS	4796244	4796753	.	+	0	ID=cds-XP_756142.1;Parent=rna-XM_751049.1;Dbxref=GeneID:3512717,Genbank:XP_756142.1;Name=XP_756142.1;Note=encoded by transcript AFUA_2G18050A~identical to oxidoreductase (GI:66853780) [Aspergillus fumigatus Af293] PMID: 15933009 similar to oxidoreductase (GI:4499843) [Claviceps purpurea] PMID: 10071219;gbkey=CDS;locus_tag=AFUA_2G18050;product=FAD binding oxidoreductase CpoX1;protein_id=XP_756142.1
NC_007195.1	RefSeq	CDS	4796823	4797842	.	+	0	ID=cds-XP_756142.1;Parent=rna-XM_751049.1;Dbxref=GeneID:3512717,Genbank:XP_756142.1;Name=XP_756142.1;Note=encoded by transcript AFUA_2G18050A~identical to oxidoreductase (GI:66853780) [Aspergillus fumigatus Af293] PMID: 15933009 similar to oxidoreductase (GI:4499843) [Claviceps purpurea] PMID: 10071219;gbkey=CDS;locus_tag=AFUA_2G18050;product=FAD binding oxidoreductase CpoX1;protein_id=XP_756142.1
NfBBE
NC_007194.1	RefSeq	gene	4830855	4832945	.	-	.	ID=gene-AFUA_1G17630;Dbxref=GeneID:3510161;Name=AFUA_1G17630;end_range=4832945,.;gbkey=Gene;gene_biotype=protein_coding;locus_tag=AFUA_1G17630;old_locus_tag=Afu1g17630;partial=true;start_range=.,4830855
NC_007194.1	RefSeq	mRNA	4830855	4832945	.	-	.	ID=rna-XM_748036.2;Parent=gene-AFUA_1G17630;Dbxref=GeneID:3510161,Genbank:XM_748036.2;Name=XM_748036.2;Note=transcript AFUA_1G17630A;end_range=4832945,.;gbkey=mRNA;locus_tag=AFUA_1G17630;partial=true;product=FAD/FMN-containing protein;start_range=.,4830855;transcript_id=XM_748036.2
NC_007194.1	RefSeq	exon	4832585	4832945	.	-	.	ID=exon-XM_748036.2-1;Parent=rna-XM_748036.2;Dbxref=GeneID:3510161,Genbank:XM_748036.2;Note=transcript AFUA_1G17630A;end_range=4832945,.;gbkey=mRNA;locus_tag=AFUA_1G17630;partial=true;product=FAD/FMN-containing protein;transcript_id=XM_748036.2
NC_007194.1	RefSeq	exon	4832420	4832528	.	-	.	ID=exon-XM_748036.2-2;Parent=rna-XM_748036.2;Dbxref=GeneID:3510161,Genbank:XM_748036.2;Note=transcript AFUA_1G17630A;gbkey=mRNA;locus_tag=AFUA_1G17630;partial=true;product=FAD/FMN-containing protein;transcript_id=XM_748036.2
NC_007194.1	RefSeq	exon	4832214	4832365	.	-	.	ID=exon-XM_748036.2-3;Parent=rna-XM_748036.2;Dbxref=GeneID:3510161,Genbank:XM_748036.2;Note=transcript AFUA_1G17630A;gbkey=mRNA;locus_tag=AFUA_1G17630;partial=true;product=FAD/FMN-containing protein;transcript_id=XM_748036.2
NC_007194.1	RefSeq	exon	4832014	4832148	.	-	.	ID=exon-XM_748036.2-4;Parent=rna-XM_748036.2;Dbxref=GeneID:3510161,Genbank:XM_748036.2;Note=transcript AFUA_1G17630A;gbkey=mRNA;locus_tag=AFUA_1G17630;partial=true;product=FAD/FMN-containing protein;transcript_id=XM_748036.2
NC_007194.1	RefSeq	exon	4831849	4831961	.	-	.	ID=exon-XM_748036.2-5;Parent=rna-XM_748036.2;Dbxref=GeneID:3510161,Genbank:XM_748036.2;Note=transcript AFUA_1G17630A;gbkey=mRNA;locus_tag=AFUA_1G17630;partial=true;product=FAD/FMN-containing protein;transcript_id=XM_748036.2
NC_007194.1	RefSeq	exon	4831300	4831780	.	-	.	ID=exon-XM_748036.2-6;Parent=rna-XM_748036.2;Dbxref=GeneID:3510161,Genbank:XM_748036.2;Note=transcript AFUA_1G17630A;gbkey=mRNA;locus_tag=AFUA_1G17630;partial=true;product=FAD/FMN-containing protein;transcript_id=XM_748036.2
NC_007194.1	RefSeq	exon	4831054	4831264	.	-	.	ID=exon-XM_748036.2-7;Parent=rna-XM_748036.2;Dbxref=GeneID:3510161,Genbank:XM_748036.2;Note=transcript AFUA_1G17630A;gbkey=mRNA;locus_tag=AFUA_1G17630;partial=true;product=FAD/FMN-containing protein;transcript_id=XM_748036.2
NC_007194.1	RefSeq	exon	4830855	4830990	.	-	.	ID=exon-XM_748036.2-8;Parent=rna-XM_748036.2;Dbxref=GeneID:3510161,Genbank:XM_748036.2;Note=transcript AFUA_1G17630A;gbkey=mRNA;locus_tag=AFUA_1G17630;partial=true;product=FAD/FMN-containing protein;start_range=.,4830855;transcript_id=XM_748036.2
NC_007194.1	RefSeq	CDS	4832585	4832945	.	-	0	ID=cds-XP_753129.2;Parent=rna-XM_748036.2;Dbxref=GeneID:3510161,Genbank:XP_753129.2;Name=XP_753129.2;Note=encoded by transcript AFUA_1G17630A~contains FAD binding domain;gbkey=CDS;locus_tag=AFUA_1G17630;product=FAD/FMN-containing protein;protein_id=XP_753129.2
NC_007194.1	RefSeq	CDS	4832420	4832528	.	-	2	ID=cds-XP_753129.2;Parent=rna-XM_748036.2;Dbxref=GeneID:3510161,Genbank:XP_753129.2;Name=XP_753129.2;Note=encoded by transcript AFUA_1G17630A~contains FAD binding domain;gbkey=CDS;locus_tag=AFUA_1G17630;product=FAD/FMN-containing protein;protein_id=XP_753129.2
NC_007194.1	RefSeq	CDS	4832214	4832365	.	-	1	ID=cds-XP_753129.2;Parent=rna-XM_748036.2;Dbxref=GeneID:3510161,Genbank:XP_753129.2;Name=XP_753129.2;Note=encoded by transcript AFUA_1G17630A~contains FAD binding domain;gbkey=CDS;locus_tag=AFUA_1G17630;product=FAD/FMN-containing protein;protein_id=XP_753129.2
NC_007194.1	RefSeq	CDS	4832014	4832148	.	-	2	ID=cds-XP_753129.2;Parent=rna-XM_748036.2;Dbxref=GeneID:3510161,Genbank:XP_753129.2;Name=XP_753129.2;Note=encoded by transcript AFUA_1G17630A~contains FAD binding domain;gbkey=CDS;locus_tag=AFUA_1G17630;product=FAD/FMN-containing protein;protein_id=XP_753129.2
NC_007194.1	RefSeq	CDS	4831849	4831961	.	-	2	ID=cds-XP_753129.2;Parent=rna-XM_748036.2;Dbxref=GeneID:3510161,Genbank:XP_753129.2;Name=XP_753129.2;Note=encoded by transcript AFUA_1G17630A~contains FAD binding domain;gbkey=CDS;locus_tag=AFUA_1G17630;product=FAD/FMN-containing protein;protein_id=XP_753129.2
NC_007194.1	RefSeq	CDS	4831300	4831780	.	-	0	ID=cds-XP_753129.2;Parent=rna-XM_748036.2;Dbxref=GeneID:3510161,Genbank:XP_753129.2;Name=XP_753129.2;Note=encoded by transcript AFUA_1G17630A~contains FAD binding domain;gbkey=CDS;locus_tag=AFUA_1G17630;product=FAD/FMN-containing protein;protein_id=XP_753129.2
NC_007194.1	RefSeq	CDS	4831054	4831264	.	-	2	ID=cds-XP_753129.2;Parent=rna-XM_748036.2;Dbxref=GeneID:3510161,Genbank:XP_753129.2;Name=XP_753129.2;Note=encoded by transcript AFUA_1G17630A~contains FAD binding domain;gbkey=CDS;locus_tag=AFUA_1G17630;product=FAD/FMN-containing protein;protein_id=XP_753129.2
NC_007194.1	RefSeq	CDS	4830855	4830990	.	-	1	ID=cds-XP_753129.2;Parent=rna-XM_748036.2;Dbxref=GeneID:3510161,Genbank:XP_753129.2;Name=XP_753129.2;Note=encoded by transcript AFUA_1G17630A~contains FAD binding domain;gbkey=CDS;locus_tag=AFUA_1G17630;product=FAD/FMN-containing protein;protein_id=XP_753129.2
THCAS
NC_044378.1	Gnomon	gene	25821934	25823723	.	+	.	ID=gene-LOC115697880;Dbxref=GeneID:115697880;Name=LOC115697880;gbkey=Gene;gene=LOC115697880;gene_biotype=protein_coding
NC_044378.1	Gnomon	mRNA	25821934	25823723	.	+	.	ID=rna-XM_030625046.1;Parent=gene-LOC115697880;Dbxref=GeneID:115697880,GenBank:XM_030625046.1;Name=XM_030625046.1;gbkey=mRNA;gene=LOC115697880;model_evidence=Supporting evidence includes similarity to: 9 mRNAs%2C 24 ESTs%2C 17 Proteins%2C and 100%25 coverage of the annotated genomic feature by RNAseq alignments;product=inactive tetrahydrocannabinolic acid synthase;transcript_id=XM_030625046.1
NC_044378.1	Gnomon	exon	25821934	25823723	.	+	.	ID=exon-XM_030625046.1-1;Parent=rna-XM_030625046.1;Dbxref=GeneID:115697880,GenBank:XM_030625046.1;gbkey=mRNA;gene=LOC115697880;product=inactive tetrahydrocannabinolic acid synthase;transcript_id=XM_030625046.1
NC_044378.1	Gnomon	CDS	25821957	25823594	.	+	0	ID=cds-XP_030480906.1;Parent=rna-XM_030625046.1;Dbxref=GeneID:115697880,GenBank:XP_030480906.1;Name=XP_030480906.1;gbkey=CDS;gene=LOC115697880;product=inactive tetrahydrocannabinolic acid synthase;protein_id=XP_030480906.1
CBDAS
same as THCAS
CvBBE
NW_005435076.1	RefSeq	gene	1408307	1410642	.	-	.	ID=gene-CHLNCDRAFT_135038;Dbxref=GeneID:17354363;Name=CHLNCDRAFT_135038;end_range=1410642,.;gbkey=Gene;gene_biotype=protein_coding;locus_tag=CHLNCDRAFT_135038;partial=true;start_range=.,1408307
NW_005435076.1	RefSeq	mRNA	1408307	1410642	.	-	.	ID=rna-XM_005847153.1;Parent=gene-CHLNCDRAFT_135038;Dbxref=GenBank:XM_005847153.1,GeneID:17354363;Name=XM_005847153.1;end_range=1410642,.;gbkey=mRNA;locus_tag=CHLNCDRAFT_135038;partial=true;product=hypothetical protein;start_range=.,1408307;transcript_id=XM_005847153.1
NW_005435076.1	RefSeq	exon	1410187	1410642	.	-	.	ID=exon-XM_005847153.1-1;Parent=rna-XM_005847153.1;Dbxref=GenBank:XM_005847153.1,GeneID:17354363;end_range=1410642,.;gbkey=mRNA;locus_tag=CHLNCDRAFT_135038;partial=true;product=hypothetical protein;transcript_id=XM_005847153.1
NW_005435076.1	RefSeq	exon	1409990	1410101	.	-	.	ID=exon-XM_005847153.1-2;Parent=rna-XM_005847153.1;Dbxref=GenBank:XM_005847153.1,GeneID:17354363;gbkey=mRNA;locus_tag=CHLNCDRAFT_135038;partial=true;product=hypothetical protein;transcript_id=XM_005847153.1
NW_005435076.1	RefSeq	exon	1409722	1409880	.	-	.	ID=exon-XM_005847153.1-3;Parent=rna-XM_005847153.1;Dbxref=GenBank:XM_005847153.1,GeneID:17354363;gbkey=mRNA;locus_tag=CHLNCDRAFT_135038;partial=true;product=hypothetical protein;transcript_id=XM_005847153.1
NW_005435076.1	RefSeq	exon	1409497	1409568	.	-	.	ID=exon-XM_005847153.1-4;Parent=rna-XM_005847153.1;Dbxref=GenBank:XM_005847153.1,GeneID:17354363;gbkey=mRNA;locus_tag=CHLNCDRAFT_135038;partial=true;product=hypothetical protein;transcript_id=XM_005847153.1
NW_005435076.1	RefSeq	exon	1409273	1409405	.	-	.	ID=exon-XM_005847153.1-5;Parent=rna-XM_005847153.1;Dbxref=GenBank:XM_005847153.1,GeneID:17354363;gbkey=mRNA;locus_tag=CHLNCDRAFT_135038;partial=true;product=hypothetical protein;transcript_id=XM_005847153.1
NW_005435076.1	RefSeq	exon	1408869	1409187	.	-	.	ID=exon-XM_005847153.1-6;Parent=rna-XM_005847153.1;Dbxref=GenBank:XM_005847153.1,GeneID:17354363;gbkey=mRNA;locus_tag=CHLNCDRAFT_135038;partial=true;product=hypothetical protein;transcript_id=XM_005847153.1
NW_005435076.1	RefSeq	exon	1408507	1408758	.	-	.	ID=exon-XM_005847153.1-7;Parent=rna-XM_005847153.1;Dbxref=GenBank:XM_005847153.1,GeneID:17354363;gbkey=mRNA;locus_tag=CHLNCDRAFT_135038;partial=true;product=hypothetical protein;transcript_id=XM_005847153.1
NW_005435076.1	RefSeq	exon	1408307	1408408	.	-	.	ID=exon-XM_005847153.1-8;Parent=rna-XM_005847153.1;Dbxref=GenBank:XM_005847153.1,GeneID:17354363;gbkey=mRNA;locus_tag=CHLNCDRAFT_135038;partial=true;product=hypothetical protein;start_range=.,1408307;transcript_id=XM_005847153.1
NW_005435076.1	RefSeq	CDS	1410187	1410642	.	-	0	ID=cds-XP_005847215.1;Parent=rna-XM_005847153.1;Dbxref=InterPro:IPR006094,JGIDB:ChlNC64A_1_135038,GenBank:XP_005847215.1,GeneID:17354363;Name=XP_005847215.1;Note=similar to hypothetical 54.4 kd protein%3B expressed;gbkey=CDS;locus_tag=CHLNCDRAFT_135038;product=hypothetical protein;protein_id=XP_005847215.1
NW_005435076.1	RefSeq	CDS	1409990	1410101	.	-	0	ID=cds-XP_005847215.1;Parent=rna-XM_005847153.1;Dbxref=InterPro:IPR006094,JGIDB:ChlNC64A_1_135038,GenBank:XP_005847215.1,GeneID:17354363;Name=XP_005847215.1;Note=similar to hypothetical 54.4 kd protein%3B expressed;gbkey=CDS;locus_tag=CHLNCDRAFT_135038;product=hypothetical protein;protein_id=XP_005847215.1
NW_005435076.1	RefSeq	CDS	1409722	1409880	.	-	2	ID=cds-XP_005847215.1;Parent=rna-XM_005847153.1;Dbxref=InterPro:IPR006094,JGIDB:ChlNC64A_1_135038,GenBank:XP_005847215.1,GeneID:17354363;Name=XP_005847215.1;Note=similar to hypothetical 54.4 kd protein%3B expressed;gbkey=CDS;locus_tag=CHLNCDRAFT_135038;product=hypothetical protein;protein_id=XP_005847215.1
NW_005435076.1	RefSeq	CDS	1409497	1409568	.	-	2	ID=cds-XP_005847215.1;Parent=rna-XM_005847153.1;Dbxref=InterPro:IPR006094,JGIDB:ChlNC64A_1_135038,GenBank:XP_005847215.1,GeneID:17354363;Name=XP_005847215.1;Note=similar to hypothetical 54.4 kd protein%3B expressed;gbkey=CDS;locus_tag=CHLNCDRAFT_135038;product=hypothetical protein;protein_id=XP_005847215.1
NW_005435076.1	RefSeq	CDS	1409273	1409405	.	-	2	ID=cds-XP_005847215.1;Parent=rna-XM_005847153.1;Dbxref=InterPro:IPR006094,JGIDB:ChlNC64A_1_135038,GenBank:XP_005847215.1,GeneID:17354363;Name=XP_005847215.1;Note=similar to hypothetical 54.4 kd protein%3B expressed;gbkey=CDS;locus_tag=CHLNCDRAFT_135038;product=hypothetical protein;protein_id=XP_005847215.1
NW_005435076.1	RefSeq	CDS	1408869	1409187	.	-	1	ID=cds-XP_005847215.1;Parent=rna-XM_005847153.1;Dbxref=InterPro:IPR006094,JGIDB:ChlNC64A_1_135038,GenBank:XP_005847215.1,GeneID:17354363;Name=XP_005847215.1;Note=similar to hypothetical 54.4 kd protein%3B expressed;gbkey=CDS;locus_tag=CHLNCDRAFT_135038;product=hypothetical protein;protein_id=XP_005847215.1
NW_005435076.1	RefSeq	CDS	1408507	1408758	.	-	0	ID=cds-XP_005847215.1;Parent=rna-XM_005847153.1;Dbxref=InterPro:IPR006094,JGIDB:ChlNC64A_1_135038,GenBank:XP_005847215.1,GeneID:17354363;Name=XP_005847215.1;Note=similar to hypothetical 54.4 kd protein%3B expressed;gbkey=CDS;locus_tag=CHLNCDRAFT_135038;product=hypothetical protein;protein_id=XP_005847215.1
NW_005435076.1	RefSeq	CDS	1408307	1408408	.	-	0	ID=cds-XP_005847215.1;Parent=rna-XM_005847153.1;Dbxref=InterPro:IPR006094,JGIDB:ChlNC64A_1_135038,GenBank:XP_005847215.1,GeneID:17354363;Name=XP_005847215.1;Note=similar to hypothetical 54.4 kd protein%3B expressed;gbkey=CDS;locus_tag=CHLNCDRAFT_135038;product=hypothetical protein;protein_id=XP_005847215.1
HOX
NW_005178873.1	RefSeq	gene	586597	588336	.	+	.	ID=gene-CHC_T00009130001;Dbxref=GeneID:17320065;Name=CHC_T00009130001;gbkey=Gene;gene_biotype=protein_coding;locus_tag=CHC_T00009130001
NW_005178873.1	RefSeq	mRNA	586597	588336	.	+	.	ID=rna-XM_005712293.1;Parent=gene-CHC_T00009130001;Dbxref=GenBank:XM_005712293.1,GeneID:17320065;Name=XM_005712293.1;gbkey=mRNA;locus_tag=CHC_T00009130001;transcript_id=XM_005712293.1
NW_005178873.1	RefSeq	exon	586597	588237	.	+	.	ID=exon-XM_005712293.1-1;Parent=rna-XM_005712293.1;Dbxref=GenBank:XM_005712293.1,GeneID:17320065;gbkey=mRNA;locus_tag=CHC_T00009130001;transcript_id=XM_005712293.1
NW_005178873.1	RefSeq	exon	588238	588336	.	+	.	ID=exon-XM_005712293.1-2;Parent=rna-XM_005712293.1;Dbxref=GenBank:XM_005712293.1,GeneID:17320065;gbkey=mRNA;locus_tag=CHC_T00009130001;transcript_id=XM_005712293.1
NW_005178873.1	RefSeq	CDS	586597	588237	.	+	0	ID=cds-XP_005712350.1;Parent=rna-XM_005712293.1;Dbxref=GenBank:XP_005712350.1,GeneID:17320065;Name=XP_005712350.1;gbkey=CDS;locus_tag=CHC_T00009130001;product=hexose oxidase;protein_id=XP_005712350.1
NW_005178873.1	RefSeq	three_prime_UTR	588238	588336	.	+	.	ID=id-CHC_T00009130001;Parent=gene-CHC_T00009130001;Dbxref=GeneID:17320065;gbkey=3'UTR;locus_tag=CHC_T00009130001
ChitO
NC_026476.1	RefSeq	gene	6016671	6018254	.	-	.	ID=gene-FGSG_10998;Dbxref=GeneID:23557872;Name=FGSG_10998;end_range=6018254,.;gbkey=Gene;gene_biotype=protein_coding;locus_tag=FGSG_10998;partial=true;start_range=.,6016671
NC_026476.1	RefSeq	mRNA	6016671	6018254	.	-	.	ID=rna-XM_011327070.1;Parent=gene-FGSG_10998;Dbxref=GeneID:23557872,GenBank:XM_011327070.1;Name=XM_011327070.1;end_range=6018254,.;gbkey=mRNA;locus_tag=FGSG_10998;partial=true;product=hypothetical protein;start_range=.,6016671;transcript_id=XM_011327070.1
NC_026476.1	RefSeq	exon	6017788	6018254	.	-	.	ID=exon-XM_011327070.1-1;Parent=rna-XM_011327070.1;Dbxref=GeneID:23557872,GenBank:XM_011327070.1;end_range=6018254,.;gbkey=mRNA;locus_tag=FGSG_10998;partial=true;product=hypothetical protein;transcript_id=XM_011327070.1
NC_026476.1	RefSeq	exon	6017196	6017733	.	-	.	ID=exon-XM_011327070.1-2;Parent=rna-XM_011327070.1;Dbxref=GeneID:23557872,GenBank:XM_011327070.1;gbkey=mRNA;locus_tag=FGSG_10998;partial=true;product=hypothetical protein;transcript_id=XM_011327070.1
NC_026476.1	RefSeq	exon	6016671	6017144	.	-	.	ID=exon-XM_011327070.1-3;Parent=rna-XM_011327070.1;Dbxref=GeneID:23557872,GenBank:XM_011327070.1;gbkey=mRNA;locus_tag=FGSG_10998;partial=true;product=hypothetical protein;start_range=.,6016671;transcript_id=XM_011327070.1
NC_026476.1	RefSeq	CDS	6017788	6018254	.	-	0	ID=cds-XP_011325372.1;Parent=rna-XM_011327070.1;Dbxref=GeneID:23557872,GenBank:XP_011325372.1;Name=XP_011325372.1;gbkey=CDS;locus_tag=FGSG_10998;product=hypothetical protein;protein_id=XP_011325372.1
NC_026476.1	RefSeq	CDS	6017196	6017733	.	-	1	ID=cds-XP_011325372.1;Parent=rna-XM_011327070.1;Dbxref=GeneID:23557872,GenBank:XP_011325372.1;Name=XP_011325372.1;gbkey=CDS;locus_tag=FGSG_10998;product=hypothetical protein;protein_id=XP_011325372.1
NC_026476.1	RefSeq	CDS	6016671	6017144	.	-	0	ID=cds-XP_011325372.1;Parent=rna-XM_011327070.1;Dbxref=GeneID:23557872,GenBank:XP_011325372.1;Name=XP_011325372.1;gbkey=CDS;locus_tag=FGSG_10998;product=hypothetical protein;protein_id=XP_011325372.1
Ha_CHOX
NC_035445.2	Gnomon	gene	117758469	117766849	.	-	.	ID=gene-LOC110899107;Dbxref=GeneID:110899107;Name=LOC110899107;gbkey=Gene;gene=LOC110899107;gene_biotype=protein_coding
NC_035445.2	Gnomon	mRNA	117758469	117766849	.	-	.	ID=rna-XM_022145983.2;Parent=gene-LOC110899107;Dbxref=GeneID:110899107,GenBank:XM_022145983.2;Name=XM_022145983.2;gbkey=mRNA;gene=LOC110899107;model_evidence=Supporting evidence includes similarity to: 8 Proteins%2C 94 long SRA reads%2C and 98%25 coverage of the annotated genomic feature by RNAseq alignments;product=berberine bridge enzyme-like 8%2C transcript variant X1;transcript_id=XM_02214598…
NC_035445.2	Gnomon	exon	117765727	117766849	.	-	.	ID=exon-XM_022145983.2-1;Parent=rna-XM_022145983.2;Dbxref=GeneID:110899107,GenBank:XM_022145983.2;gbkey=mRNA;gene=LOC110899107;product=berberine bridge enzyme-like 8%2C transcript variant X1;transcript_id=XM_022145983.2
NC_035445.2	Gnomon	exon	117758469	117759150	.	-	.	ID=exon-XM_022145983.2-2;Parent=rna-XM_022145983.2;Dbxref=GeneID:110899107,GenBank:XM_022145983.2;gbkey=mRNA;gene=LOC110899107;product=berberine bridge enzyme-like 8%2C transcript variant X1;transcript_id=XM_022145983.2
NC_035445.2	Gnomon	CDS	117765727	117766830	.	-	0	ID=cds-XP_022001675.1;Parent=rna-XM_022145983.2;Dbxref=GeneID:110899107,GenBank:XP_022001675.1;Name=XP_022001675.1;gbkey=CDS;gene=LOC110899107;product=berberine bridge enzyme-like 8 isoform X1;protein_id=XP_022001675.1
NC_035445.2	Gnomon	CDS	117758638	117759150	.	-	0	ID=cds-XP_022001675.1;Parent=rna-XM_022145983.2;Dbxref=GeneID:110899107,GenBank:XP_022001675.1;Name=XP_022001675.1;gbkey=CDS;gene=LOC110899107;product=berberine bridge enzyme-like 8 isoform X1;protein_id=XP_022001675.1
Ls_CHOX
NC_056625.2	Gnomon	gene	232755879	232757812	.	-	.	ID=gene-LOC111908949;Dbxref=GeneID:111908949;Name=LOC111908949;description=berberine bridge enzyme-like 8;gbkey=Gene;gene=LOC111908949;gene_biotype=protein_coding
NC_056625.2	Gnomon	mRNA	232755879	232757812	.	-	.	ID=rna-XM_023904734.2;Parent=gene-LOC111908949;Dbxref=GeneID:111908949,GenBank:XM_023904734.2;Name=XM_023904734.2;experiment=COORDINATES: polyA evidence [ECO:0006239];gbkey=mRNA;gene=LOC111908949;model_evidence=Supporting evidence includes similarity to: 1 mRNA%2C 17 Proteins;product=berberine bridge enzyme-like 8;transcript_id=XM_023904734.2
NC_056625.2	Gnomon	exon	232755879	232757812	.	-	.	ID=exon-XM_023904734.2-1;Parent=rna-XM_023904734.2;Dbxref=GeneID:111908949,GenBank:XM_023904734.2;experiment=COORDINATES: polyA evidence [ECO:0006239];gbkey=mRNA;gene=LOC111908949;product=berberine bridge enzyme-like 8;transcript_id=XM_023904734.2
NC_056625.2	Gnomon	CDS	232756169	232757791	.	-	0	ID=cds-XP_023760502.1;Parent=rna-XM_023904734.2;Dbxref=GeneID:111908949,GenBank:XP_023760502.1;Name=XP_023760502.1;gbkey=CDS;gene=LOC111908949;product=berberine bridge enzyme-like 8;protein_id=XP_023760502.1
BBLd
NW_015905273.1	Gnomon	gene	45207	50518	.	+	.	ID=gene-LOC107779537;Dbxref=GeneID:107779537;Name=LOC107779537;gbkey=Gene;gene=LOC107779537;gene_biotype=protein_coding
NW_015905273.1	Gnomon	mRNA	45207	50518	.	+	.	ID=rna-XM_016599987.1;Parent=gene-LOC107779537;Dbxref=GeneID:107779537,Genbank:XM_016599987.1;Name=XM_016599987.1;gbkey=mRNA;gene=LOC107779537;model_evidence=Supporting evidence includes similarity to: 1 mRNA%2C 2 ESTs%2C 5 Proteins%2C and 100%25 coverage of the annotated genomic feature by RNAseq alignments;product=reticuline oxidase-like;transcript_id=XM_016599987.1
NW_015905273.1	Gnomon	exon	45207	50518	.	+	.	ID=exon-XM_016599987.1-1;Parent=rna-XM_016599987.1;Dbxref=GeneID:107779537,Genbank:XM_016599987.1;gbkey=mRNA;gene=LOC107779537;product=reticuline oxidase-like;transcript_id=XM_016599987.1
NW_015905273.1	Gnomon	CDS	48346	50049	.	+	0	ID=cds-XP_016455473.1;Parent=rna-XM_016599987.1;Dbxref=GeneID:107779537,Genbank:XP_016455473.1;Name=XP_016455473.1;gbkey=CDS;gene=LOC107779537;product=reticuline oxidase-like;protein_id=XP_016455473.1
BBLc
NW_015916796.1	Gnomon	gene	48134	52291	.	-	.	ID=gene-LOC107789210;Dbxref=GeneID:107789210;Name=LOC107789210;gbkey=Gene;gene=LOC107789210;gene_biotype=protein_coding
NW_015916796.1	Gnomon	mRNA	48134	52291	.	-	.	ID=rna-XM_016610985.1;Parent=gene-LOC107789210;Dbxref=GeneID:107789210,Genbank:XM_016610985.1;Name=XM_016610985.1;gbkey=mRNA;gene=LOC107789210;model_evidence=Supporting evidence includes similarity to: 5 ESTs%2C 4 Proteins%2C and 100%25 coverage of the annotated genomic feature by RNAseq alignments;product=reticuline oxidase-like;transcript_id=XM_016610985.1
NW_015916796.1	Gnomon	exon	48134	52291	.	-	.	ID=exon-XM_016610985.1-1;Parent=rna-XM_016610985.1;Dbxref=GeneID:107789210,Genbank:XM_016610985.1;gbkey=mRNA;gene=LOC107789210;product=reticuline oxidase-like;transcript_id=XM_016610985.1
NW_015916796.1	Gnomon	CDS	50445	52142	.	-	0	ID=cds-XP_016466471.1;Parent=rna-XM_016610985.1;Dbxref=GeneID:107789210,Genbank:XP_016466471.1;Name=XP_016466471.1;gbkey=CDS;gene=LOC107789210;product=reticuline oxidase-like;protein_id=XP_016466471.1
BBLb
same as BBLc
BBLa
same as BBLc
Dbv29
NZ_CP084058.1	RefSeq	gene	1613889	1615499	.	-	.	ID=gene-LCN96_RS07925;Name=LCN96_RS07925;gbkey=Gene;gene_biotype=protein_coding;locus_tag=LCN96_RS07925;old_locus_tag=LCN96_07925
NZ_CP084058.1	Protein Homology	CDS	1613889	1615499	.	-	0	ID=cds-WP_225271926.1;Parent=gene-LCN96_RS07925;Dbxref=Genbank:WP_225271926.1;Name=WP_225271926.1;Ontology_term=GO:0016491,GO:0050660;gbkey=CDS;go_function=oxidoreductase activity|0016491||IEA,flavin adenine dinucleotide binding|0050660||IEA;inference=COORDINATES: protein motif:HMM:NF013714.2;locus_tag=LCN96_RS07925;product=BBE domain-containing protein;protein_id=WP_225271926.1;transl_table=11
6HDNO
NZ_CP089294.1	RefSeq	gene	143699	145075	.	+	.	ID=gene-JMY29_RS20780;Name=JMY29_RS20780;gbkey=Gene;gene_biotype=protein_coding;locus_tag=JMY29_RS20780;old_locus_tag=JMY29_20780
NZ_CP089294.1	Protein Homology	CDS	143699	145075	.	+	0	ID=cds-WP_181968447.1;Parent=gene-JMY29_RS20780;Dbxref=GenBank:WP_181968447.1;Name=WP_181968447.1;gbkey=CDS;inference=COORDINATES: similar to AA sequence:RefSeq:WP_017200494.1;locus_tag=JMY29_RS20780;product=FAD-binding oxidoreductase;protein_id=WP_181968447.1;transl_table=11
PpBBE3
NC_037254.1	Gnomon	mRNA	8275850	8279888	.	-	.	ID=rna-XM_024512380.1;Parent=gene-LOC112278719;Dbxref=GeneID:112278719,Genbank:XM_024512380.1;Name=XM_024512380.1;gbkey=mRNA;gene=LOC112278719;model_evidence=Supporting evidence includes similarity to: 36 ESTs%2C 2 Proteins%2C and 100%25 coverage of the annotated genomic feature by RNAseq alignments%2C including 29 samples with support for all annotated introns;product=uncharacterized FAD-linked …
NC_037254.1	Gnomon	exon	8279043	8279888	.	-	.	ID=exon-XM_024512380.1-1;Parent=rna-XM_024512380.1;Dbxref=GeneID:112278719,Genbank:XM_024512380.1;gbkey=mRNA;gene=LOC112278719;product=uncharacterized FAD-linked oxidoreductase ARB_02478-like%2C transcript variant X1;transcript_id=XM_024512380.1
NC_037254.1	Gnomon	exon	8275850	8278761	.	-	.	ID=exon-XM_024512380.1-2;Parent=rna-XM_024512380.1;Dbxref=GeneID:112278719,Genbank:XM_024512380.1;gbkey=mRNA;gene=LOC112278719;product=uncharacterized FAD-linked oxidoreductase ARB_02478-like%2C transcript variant X1;transcript_id=XM_024512380.1
NC_037254.1	Gnomon	CDS	8279043	8279226	.	-	0	ID=cds-XP_024368148.1;Parent=rna-XM_024512380.1;Dbxref=GeneID:112278719,Genbank:XP_024368148.1;Name=XP_024368148.1;gbkey=CDS;gene=LOC112278719;product=uncharacterized FAD-linked oxidoreductase ARB_02478-like;protein_id=XP_024368148.1
NC_037254.1	Gnomon	CDS	8277188	8278761	.	-	2	ID=cds-XP_024368148.1;Parent=rna-XM_024512380.1;Dbxref=GeneID:112278719,Genbank:XP_024368148.1;Name=XP_024368148.1;gbkey=CDS;gene=LOC112278719;product=uncharacterized FAD-linked oxidoreductase ARB_02478-like;protein_id=XP_024368148.1
PpBBE1
NC_037264.1	Gnomon	mRNA	2141296	2144350	.	+	.	ID=rna-XM_024535252.1;Parent=gene-LOC112289746;Dbxref=GeneID:112289746,Genbank:XM_024535252.1;Name=XM_024535252.1;gbkey=mRNA;gene=LOC112289746;model_evidence=Supporting evidence includes similarity to: 11 ESTs%2C 96 Proteins%2C and 100%25 coverage of the annotated genomic feature by RNAseq alignments%2C including 108 samples with support for all annotated introns;product=uncharacterized FAD-linke…
NC_037264.1	Gnomon	exon	2141296	2141894	.	+	.	ID=exon-XM_024535252.1-1;Parent=rna-XM_024535252.1;Dbxref=GeneID:112289746,Genbank:XM_024535252.1;gbkey=mRNA;gene=LOC112289746;product=uncharacterized FAD-linked oxidoreductase YvdP-like%2C transcript variant X1;transcript_id=XM_024535252.1
NC_037264.1	Gnomon	exon	2142214	2142469	.	+	.	ID=exon-XM_024535252.1-2;Parent=rna-XM_024535252.1;Dbxref=GeneID:112289746,Genbank:XM_024535252.1;gbkey=mRNA;gene=LOC112289746;product=uncharacterized FAD-linked oxidoreductase YvdP-like%2C transcript variant X1;transcript_id=XM_024535252.1
NC_037264.1	Gnomon	exon	2142586	2144350	.	+	.	ID=exon-XM_024535252.1-3;Parent=rna-XM_024535252.1;Dbxref=GeneID:112289746,Genbank:XM_024535252.1;gbkey=mRNA;gene=LOC112289746;product=uncharacterized FAD-linked oxidoreductase YvdP-like%2C transcript variant X1;transcript_id=XM_024535252.1
NC_037264.1	Gnomon	CDS	2141796	2141894	.	+	0	ID=cds-XP_024391020.1;Parent=rna-XM_024535252.1;Dbxref=GeneID:112289746,Genbank:XP_024391020.1;Name=XP_024391020.1;gbkey=CDS;gene=LOC112289746;product=uncharacterized protein LOC112289746 isoform X1;protein_id=XP_024391020.1
NC_037264.1	Gnomon	CDS	2142214	2142469	.	+	0	ID=cds-XP_024391020.1;Parent=rna-XM_024535252.1;Dbxref=GeneID:112289746,Genbank:XP_024391020.1;Name=XP_024391020.1;gbkey=CDS;gene=LOC112289746;product=uncharacterized protein LOC112289746 isoform X1;protein_id=XP_024391020.1
NC_037264.1	Gnomon	CDS	2142586	2143736	.	+	2	ID=cds-XP_024391020.1;Parent=rna-XM_024535252.1;Dbxref=GeneID:112289746,Genbank:XP_024391020.1;Name=XP_024391020.1;gbkey=CDS;gene=LOC112289746;product=uncharacterized protein LOC112289746 isoform X1;protein_id=XP_024391020.1
PiBBE4
NW_003303756.1	RefSeq	gene	4926896	4928446	.	+	.	ID=gene-PITG_02930;Dbxref=GeneID:9477001;Name=PITG_02930;end_range=4928446,.;gbkey=Gene;gene_biotype=protein_coding;locus_tag=PITG_02930;partial=true;start_range=.,4926896
NW_003303756.1	RefSeq	mRNA	4926896	4928446	.	+	.	ID=rna-XM_002907741.1;Parent=gene-PITG_02930;Dbxref=GenBank:XM_002907741.1,GeneID:9477001;Name=XM_002907741.1;end_range=4928446,.;gbkey=mRNA;locus_tag=PITG_02930;partial=true;product=berberine-like protein;start_range=.,4926896;transcript_id=XM_002907741.1
NW_003303756.1	RefSeq	exon	4926896	4928446	.	+	.	ID=exon-XM_002907741.1-1;Parent=rna-XM_002907741.1;Dbxref=GenBank:XM_002907741.1,GeneID:9477001;end_range=4928446,.;gbkey=mRNA;locus_tag=PITG_02930;partial=true;product=berberine-like protein;start_range=.,4926896;transcript_id=XM_002907741.1
NW_003303756.1	RefSeq	CDS	4926896	4928446	.	+	0	ID=cds-XP_002907787.1;Parent=rna-XM_002907741.1;Dbxref=GenBank:XP_002907787.1,GeneID:9477001;Name=XP_002907787.1;gbkey=CDS;locus_tag=PITG_02930;product=berberine-like protein;protein_id=XP_002907787.1
PiBBE5
NW_003303756.1	RefSeq	gene	4941317	4942840	.	-	.	ID=gene-PITG_02935;Dbxref=GeneID:9477005;Name=PITG_02935;end_range=4942840,.;gbkey=Gene;gene_biotype=protein_coding;locus_tag=PITG_02935;partial=true;start_range=.,4941317
NW_003303756.1	RefSeq	mRNA	4941317	4942840	.	-	.	ID=rna-XM_002907745.1;Parent=gene-PITG_02935;Dbxref=GenBank:XM_002907745.1,GeneID:9477005;Name=XM_002907745.1;end_range=4942840,.;gbkey=mRNA;locus_tag=PITG_02935;partial=true;product=berberine-like protein;start_range=.,4941317;transcript_id=XM_002907745.1
NW_003303756.1	RefSeq	exon	4941317	4942840	.	-	.	ID=exon-XM_002907745.1-1;Parent=rna-XM_002907745.1;Dbxref=GenBank:XM_002907745.1,GeneID:9477005;end_range=4942840,.;gbkey=mRNA;locus_tag=PITG_02935;partial=true;product=berberine-like protein;start_range=.,4941317;transcript_id=XM_002907745.1
NW_003303756.1	RefSeq	CDS	4941317	4942840	.	-	0	ID=cds-XP_002907791.1;Parent=rna-XM_002907745.1;Dbxref=GenBank:XP_002907791.1,GeneID:9477005;Name=XP_002907791.1;gbkey=CDS;locus_tag=PITG_02935;product=berberine-like protein;protein_id=XP_002907791.1
PiBBE3
NW_003303756.1	RefSeq	gene	4918379	4919908	.	-	.	ID=gene-PITG_02928;Dbxref=GeneID:9477000;Name=PITG_02928;end_range=4919908,.;gbkey=Gene;gene_biotype=protein_coding;locus_tag=PITG_02928;partial=true;start_range=.,4918379
NW_003303756.1	RefSeq	mRNA	4918379	4919908	.	-	.	ID=rna-XM_002907740.1;Parent=gene-PITG_02928;Dbxref=GenBank:XM_002907740.1,GeneID:9477000;Name=XM_002907740.1;end_range=4919908,.;gbkey=mRNA;locus_tag=PITG_02928;partial=true;product=berberine-like protein;start_range=.,4918379;transcript_id=XM_002907740.1
NW_003303756.1	RefSeq	exon	4918379	4919908	.	-	.	ID=exon-XM_002907740.1-1;Parent=rna-XM_002907740.1;Dbxref=GenBank:XM_002907740.1,GeneID:9477000;end_range=4919908,.;gbkey=mRNA;locus_tag=PITG_02928;partial=true;product=berberine-like protein;start_range=.,4918379;transcript_id=XM_002907740.1
NW_003303756.1	RefSeq	CDS	4918379	4919908	.	-	0	ID=cds-XP_002907786.1;Parent=rna-XM_002907740.1;Dbxref=GenBank:XP_002907786.1,GeneID:9477000;Name=XP_002907786.1;gbkey=CDS;locus_tag=PITG_02928;product=berberine-like protein;protein_id=XP_002907786.1
PiBBE2
NW_003303751.1	RefSeq	gene	3095611	3097310	.	+	.	ID=gene-PITG_06591;Dbxref=GeneID:9471862;Name=PITG_06591;end_range=3097310,.;gbkey=Gene;gene_biotype=protein_coding;locus_tag=PITG_06591;partial=true;start_range=.,3095611
NW_003303751.1	RefSeq	mRNA	3095611	3097310	.	+	.	ID=rna-XM_002998633.1;Parent=gene-PITG_06591;Dbxref=GenBank:XM_002998633.1,GeneID:9471862;Name=XM_002998633.1;gbkey=mRNA;locus_tag=PITG_06591;product=berberine-like protein;transcript_id=XM_002998633.1
NW_003303751.1	RefSeq	exon	3095611	3097310	.	+	.	ID=exon-XM_002998633.1-1;Parent=rna-XM_002998633.1;Dbxref=GenBank:XM_002998633.1,GeneID:9471862;gbkey=mRNA;locus_tag=PITG_06591;product=berberine-like protein;transcript_id=XM_002998633.1
NW_003303751.1	RefSeq	CDS	3095659	3097185	.	+	0	ID=cds-XP_002998679.1;Parent=rna-XM_002998633.1;Dbxref=GenBank:XP_002998679.1,GeneID:9471862;Name=XP_002998679.1;gbkey=CDS;locus_tag=PITG_06591;product=berberine-like protein;protein_id=XP_002998679.1
PiBBE1
NW_003303751.1	RefSeq	gene	2992607	2994130	.	-	.	ID=gene-PITG_06585;Dbxref=GeneID:9471857;Name=PITG_06585;end_range=2994130,.;gbkey=Gene;gene_biotype=protein_coding;locus_tag=PITG_06585;partial=true;start_range=.,2992607
NW_003303751.1	RefSeq	mRNA	2992607	2994130	.	-	.	ID=rna-XM_002998628.1;Parent=gene-PITG_06585;Dbxref=GenBank:XM_002998628.1,GeneID:9471857;Name=XM_002998628.1;end_range=2994130,.;gbkey=mRNA;locus_tag=PITG_06585;partial=true;product=berberine-like protein;start_range=.,2992607;transcript_id=XM_002998628.1
NW_003303751.1	RefSeq	exon	2993783	2994130	.	-	.	ID=exon-XM_002998628.1-1;Parent=rna-XM_002998628.1;Dbxref=GenBank:XM_002998628.1,GeneID:9471857;end_range=2994130,.;gbkey=mRNA;locus_tag=PITG_06585;partial=true;product=berberine-like protein;transcript_id=XM_002998628.1
NW_003303751.1	RefSeq	exon	2992871	2993732	.	-	.	ID=exon-XM_002998628.1-2;Parent=rna-XM_002998628.1;Dbxref=GenBank:XM_002998628.1,GeneID:9471857;gbkey=mRNA;locus_tag=PITG_06585;partial=true;product=berberine-like protein;transcript_id=XM_002998628.1
NW_003303751.1	RefSeq	exon	2992607	2992803	.	-	.	ID=exon-XM_002998628.1-3;Parent=rna-XM_002998628.1;Dbxref=GenBank:XM_002998628.1,GeneID:9471857;gbkey=mRNA;locus_tag=PITG_06585;partial=true;product=berberine-like protein;start_range=.,2992607;transcript_id=XM_002998628.1
NW_003303751.1	RefSeq	CDS	2993783	2994130	.	-	0	ID=cds-XP_002998674.1;Parent=rna-XM_002998628.1;Dbxref=GenBank:XP_002998674.1,GeneID:9471857;Name=XP_002998674.1;gbkey=CDS;locus_tag=PITG_06585;product=berberine-like protein;protein_id=XP_002998674.1
NW_003303751.1	RefSeq	CDS	2992871	2993732	.	-	0	ID=cds-XP_002998674.1;Parent=rna-XM_002998628.1;Dbxref=GenBank:XP_002998674.1,GeneID:9471857;Name=XP_002998674.1;gbkey=CDS;locus_tag=PITG_06585;product=berberine-like protein;protein_id=XP_002998674.1
NW_003303751.1	RefSeq	CDS	2992607	2992803	.	-	2	ID=cds-XP_002998674.1;Parent=rna-XM_002998628.1;Dbxref=GenBank:XP_002998674.1,GeneID:9471857;Name=XP_002998674.1;gbkey=CDS;locus_tag=PITG_06585;product=berberine-like protein;protein_id=XP_002998674.1
PiBBE6
NW_003303553.1	RefSeq	gene	5342	6965	.	+	.	ID=gene-PITG_20764;Dbxref=GeneID:9466957;Name=PITG_20764;end_range=6965,.;gbkey=Gene;gene_biotype=protein_coding;locus_tag=PITG_20764;partial=true;start_range=.,5342
NW_003303553.1	RefSeq	mRNA	5342	6965	.	+	.	ID=rna-XM_002895280.1;Parent=gene-PITG_20764;Dbxref=GenBank:XM_002895280.1,GeneID:9466957;Name=XM_002895280.1;gbkey=mRNA;locus_tag=PITG_20764;partial=true;product=conserved hypothetical protein;start_range=.,5342;transcript_id=XM_002895280.1
NW_003303553.1	RefSeq	exon	5342	5656	.	+	.	ID=exon-XM_002895280.1-1;Parent=rna-XM_002895280.1;Dbxref=GenBank:XM_002895280.1,GeneID:9466957;gbkey=mRNA;locus_tag=PITG_20764;partial=true;product=conserved hypothetical protein;start_range=.,5342;transcript_id=XM_002895280.1
NW_003303553.1	RefSeq	exon	5698	6965	.	+	.	ID=exon-XM_002895280.1-2;Parent=rna-XM_002895280.1;Dbxref=GenBank:XM_002895280.1,GeneID:9466957;gbkey=mRNA;locus_tag=PITG_20764;partial=true;product=conserved hypothetical protein;transcript_id=XM_002895280.1
NW_003303553.1	RefSeq	CDS	5342	5656	.	+	0	ID=cds-XP_002895326.1;Parent=rna-XM_002895280.1;Dbxref=GenBank:XP_002895326.1,GeneID:9466957;Name=XP_002895326.1;gbkey=CDS;locus_tag=PITG_20764;product=hypothetical protein;protein_id=XP_002895326.1
NW_003303553.1	RefSeq	CDS	5698	6900	.	+	0	ID=cds-XP_002895326.1;Parent=rna-XM_002895280.1;Dbxref=GenBank:XP_002895326.1,GeneID:9466957;Name=XP_002895326.1;gbkey=CDS;locus_tag=PITG_20764;product=hypothetical protein;protein_id=XP_002895326.1
SmBBE
NW_003314312.1	Gnomon	gene	1394442	1397022	.	-	.	ID=gene-LOC9634869;Dbxref=GeneID:9634869;Name=LOC9634869;gbkey=Gene;gene=LOC9634869;gene_biotype=protein_coding
NW_003314312.1	Gnomon	mRNA	1394442	1397022	.	-	.	ID=rna-XM_002981977.2;Parent=gene-LOC9634869;Dbxref=GeneID:9634869,Genbank:XM_002981977.2;Name=XM_002981977.2;gbkey=mRNA;gene=LOC9634869;model_evidence=Supporting evidence includes similarity to: 1 Protein%2C and 100%25 coverage of the annotated genomic feature by RNAseq alignments%2C including 7 samples with support for all annotated introns;product=uncharacterized FAD-linked oxidoreductase ARB_…
NW_003314312.1	Gnomon	exon	1395128	1397022	.	-	.	ID=exon-XM_002981977.2-1;Parent=rna-XM_002981977.2;Dbxref=GeneID:9634869,Genbank:XM_002981977.2;gbkey=mRNA;gene=LOC9634869;product=uncharacterized FAD-linked oxidoreductase ARB_02478%2C transcript variant X1;transcript_id=XM_002981977.2
NW_003314312.1	Gnomon	exon	1394917	1395058	.	-	.	ID=exon-XM_002981977.2-2;Parent=rna-XM_002981977.2;Dbxref=GeneID:9634869,Genbank:XM_002981977.2;gbkey=mRNA;gene=LOC9634869;product=uncharacterized FAD-linked oxidoreductase ARB_02478%2C transcript variant X1;transcript_id=XM_002981977.2
NW_003314312.1	Gnomon	exon	1394801	1394862	.	-	.	ID=exon-XM_002981977.2-3;Parent=rna-XM_002981977.2;Dbxref=GeneID:9634869,Genbank:XM_002981977.2;gbkey=mRNA;gene=LOC9634869;product=uncharacterized FAD-linked oxidoreductase ARB_02478%2C transcript variant X1;transcript_id=XM_002981977.2
NW_003314312.1	Gnomon	exon	1394442	1394744	.	-	.	ID=exon-XM_002981977.2-4;Parent=rna-XM_002981977.2;Dbxref=GeneID:9634869,Genbank:XM_002981977.2;gbkey=mRNA;gene=LOC9634869;product=uncharacterized FAD-linked oxidoreductase ARB_02478%2C transcript variant X1;transcript_id=XM_002981977.2
NW_003314312.1	Gnomon	CDS	1395294	1396970	.	-	0	ID=cds-XP_002982023.1;Parent=rna-XM_002981977.2;Dbxref=GeneID:9634869,Genbank:XP_002982023.1;Name=XP_002982023.1;gbkey=CDS;gene=LOC9634869;product=uncharacterized FAD-linked oxidoreductase ARB_02478;protein_id=XP_002982023.1
TamL
NZ_CP029188.1	RefSeq	gene	6533912	6535414	.	-	.	ID=gene-DDW44_RS28220;Name=DDW44_RS28220;gbkey=Gene;gene_biotype=protein_coding;locus_tag=DDW44_RS28220;old_locus_tag=DDW44_28220
NZ_CP029188.1	Protein Homology	CDS	6533912	6535414	.	-	0	ID=cds-WP_108908236.1;Parent=gene-DDW44_RS28220;Dbxref=GenBank:WP_108908236.1;Name=WP_108908236.1;Ontology_term=GO:0016491,GO:0050660;gbkey=CDS;go_function=oxidoreductase activity|0016491||IEA,flavin adenine dinucleotide binding|0050660||IEA;inference=COORDINATES: protein motif:HMM:NF013714.2;locus_tag=DDW44_RS28220;product=FAD-binding protein;protein_id=WP_108908236.1;transl_table=11
XylO
NC_016475.1	RefSeq	gene	458655	460362	.	-	.	ID=gene-MYCTH_102971;Dbxref=GeneID:11510048;Name=MYCTH_102971;end_range=460362,.;gbkey=Gene;gene_biotype=protein_coding;locus_tag=MYCTH_102971;partial=true;start_range=.,458655
NC_016475.1	RefSeq	mRNA	458655	460362	.	-	.	ID=rna-XM_003663710.1;Parent=gene-MYCTH_102971;Dbxref=GeneID:11510048,GenBank:XM_003663710.1;Name=XM_003663710.1;end_range=460362,.;gbkey=mRNA;locus_tag=MYCTH_102971;orig_protein_id=gnl|jgi|MYCTH_102971;orig_transcript_id=gnl|jgi|MYCTH_mRNA102971;partial=true;product=FAD linked oxidase-like protein;start_range=.,458655;transcript_id=XM_003663710.1
NC_016475.1	RefSeq	exon	459893	460362	.	-	.	ID=exon-XM_003663710.1-1;Parent=rna-XM_003663710.1;Dbxref=GeneID:11510048,GenBank:XM_003663710.1;end_range=460362,.;gbkey=mRNA;locus_tag=MYCTH_102971;orig_protein_id=gnl|jgi|MYCTH_102971;orig_transcript_id=gnl|jgi|MYCTH_mRNA102971;partial=true;product=FAD linked oxidase-like protein;transcript_id=XM_003663710.1
NC_016475.1	RefSeq	exon	459271	459814	.	-	.	ID=exon-XM_003663710.1-2;Parent=rna-XM_003663710.1;Dbxref=GeneID:11510048,GenBank:XM_003663710.1;gbkey=mRNA;locus_tag=MYCTH_102971;orig_protein_id=gnl|jgi|MYCTH_102971;orig_transcript_id=gnl|jgi|MYCTH_mRNA102971;partial=true;product=FAD linked oxidase-like protein;transcript_id=XM_003663710.1
NC_016475.1	RefSeq	exon	458655	459134	.	-	.	ID=exon-XM_003663710.1-3;Parent=rna-XM_003663710.1;Dbxref=GeneID:11510048,GenBank:XM_003663710.1;gbkey=mRNA;locus_tag=MYCTH_102971;orig_protein_id=gnl|jgi|MYCTH_102971;orig_transcript_id=gnl|jgi|MYCTH_mRNA102971;partial=true;product=FAD linked oxidase-like protein;start_range=.,458655;transcript_id=XM_003663710.1
NC_016475.1	RefSeq	CDS	459893	460362	.	-	0	ID=cds-XP_003663758.1;Parent=rna-XM_003663710.1;Dbxref=InterPro:IPR006094,InterPro:IPR012951,JGIDB:Spoth2_102971,GeneID:11510048,GenBank:XP_003663758.1;Name=XP_003663758.1;gbkey=CDS;locus_tag=MYCTH_102971;orig_transcript_id=gnl|jgi|MYCTH_mRNA102971;product=FAD linked oxidase-like protein;protein_id=XP_003663758.1
NC_016475.1	RefSeq	CDS	459271	459814	.	-	1	ID=cds-XP_003663758.1;Parent=rna-XM_003663710.1;Dbxref=InterPro:IPR006094,InterPro:IPR012951,JGIDB:Spoth2_102971,GeneID:11510048,GenBank:XP_003663758.1;Name=XP_003663758.1;gbkey=CDS;locus_tag=MYCTH_102971;orig_transcript_id=gnl|jgi|MYCTH_mRNA102971;product=FAD linked oxidase-like protein;protein_id=XP_003663758.1
NC_016475.1	RefSeq	CDS	458655	459134	.	-	0	ID=cds-XP_003663758.1;Parent=rna-XM_003663710.1;Dbxref=InterPro:IPR006094,InterPro:IPR012951,JGIDB:Spoth2_102971,GeneID:11510048,GenBank:XP_003663758.1;Name=XP_003663758.1;gbkey=CDS;locus_tag=MYCTH_102971;orig_transcript_id=gnl|jgi|MYCTH_mRNA102971;product=FAD linked oxidase-like protein;protein_id=XP_003663758.1
MtVAO615
NC_016474.1	RefSeq	gene	4931105	4933467	.	-	.	ID=gene-MYCTH_2305637;Dbxref=GeneID:11509727;Name=MYCTH_2305637;gbkey=Gene;gene_biotype=protein_coding;locus_tag=MYCTH_2305637
NC_016474.1	RefSeq	mRNA	4931105	4933467	.	-	.	ID=rna-XM_003663567.1;Parent=gene-MYCTH_2305637;Dbxref=GeneID:11509727,GenBank:XM_003663567.1;Name=XM_003663567.1;gbkey=mRNA;locus_tag=MYCTH_2305637;orig_protein_id=gnl|jgi|MYCTH_2305637;orig_transcript_id=gnl|jgi|MYCTH_mRNA2305637;product=uncharacterized protein;transcript_id=XM_003663567.1
NC_016474.1	RefSeq	exon	4932962	4933467	.	-	.	ID=exon-XM_003663567.1-1;Parent=rna-XM_003663567.1;Dbxref=GeneID:11509727,GenBank:XM_003663567.1;gbkey=mRNA;locus_tag=MYCTH_2305637;orig_protein_id=gnl|jgi|MYCTH_2305637;orig_transcript_id=gnl|jgi|MYCTH_mRNA2305637;product=uncharacterized protein;transcript_id=XM_003663567.1
NC_016474.1	RefSeq	exon	4932657	4932857	.	-	.	ID=exon-XM_003663567.1-2;Parent=rna-XM_003663567.1;Dbxref=GeneID:11509727,GenBank:XM_003663567.1;gbkey=mRNA;locus_tag=MYCTH_2305637;orig_protein_id=gnl|jgi|MYCTH_2305637;orig_transcript_id=gnl|jgi|MYCTH_mRNA2305637;product=uncharacterized protein;transcript_id=XM_003663567.1
NC_016474.1	RefSeq	exon	4931105	4932585	.	-	.	ID=exon-XM_003663567.1-3;Parent=rna-XM_003663567.1;Dbxref=GeneID:11509727,GenBank:XM_003663567.1;gbkey=mRNA;locus_tag=MYCTH_2305637;orig_protein_id=gnl|jgi|MYCTH_2305637;orig_transcript_id=gnl|jgi|MYCTH_mRNA2305637;product=uncharacterized protein;transcript_id=XM_003663567.1
NC_016474.1	RefSeq	CDS	4932962	4933233	.	-	0	ID=cds-XP_003663615.1;Parent=rna-XM_003663567.1;Dbxref=InterPro:IPR006094,InterPro:IPR012951,JGIDB:Spoth2_2305637,GeneID:11509727,GenBank:XP_003663615.1;Name=XP_003663615.1;gbkey=CDS;locus_tag=MYCTH_2305637;orig_transcript_id=gnl|jgi|MYCTH_mRNA2305637;product=uncharacterized protein;protein_id=XP_003663615.1
NC_016474.1	RefSeq	CDS	4932657	4932857	.	-	1	ID=cds-XP_003663615.1;Parent=rna-XM_003663567.1;Dbxref=InterPro:IPR006094,InterPro:IPR012951,JGIDB:Spoth2_2305637,GeneID:11509727,GenBank:XP_003663615.1;Name=XP_003663615.1;gbkey=CDS;locus_tag=MYCTH_2305637;orig_transcript_id=gnl|jgi|MYCTH_mRNA2305637;product=uncharacterized protein;protein_id=XP_003663615.1
NC_016474.1	RefSeq	CDS	4931334	4932585	.	-	1	ID=cds-XP_003663615.1;Parent=rna-XM_003663567.1;Dbxref=InterPro:IPR006094,InterPro:IPR012951,JGIDB:Spoth2_2305637,GeneID:11509727,GenBank:XP_003663615.1;Name=XP_003663615.1;gbkey=CDS;locus_tag=MYCTH_2305637;orig_transcript_id=gnl|jgi|MYCTH_mRNA2305637;product=uncharacterized protein;protein_id=XP_003663615.1
MtVAO713
NC_016477.1	RefSeq	gene	6238	8298	.	-	.	ID=gene-MYCTH_2309690;Dbxref=GeneID:11511535;Name=MYCTH_2309690;gbkey=Gene;gene_biotype=protein_coding;locus_tag=MYCTH_2309690
NC_016477.1	RefSeq	mRNA	6238	8298	.	-	.	ID=rna-XM_003665665.1;Parent=gene-MYCTH_2309690;Dbxref=GeneID:11511535,GenBank:XM_003665665.1;Name=XM_003665665.1;gbkey=mRNA;locus_tag=MYCTH_2309690;orig_protein_id=gnl|jgi|MYCTH_2309690;orig_transcript_id=gnl|jgi|MYCTH_mRNA2309690;product=alcohol oxidase;transcript_id=XM_003665665.1
NC_016477.1	RefSeq	exon	8097	8298	.	-	.	ID=exon-XM_003665665.1-1;Parent=rna-XM_003665665.1;Dbxref=GeneID:11511535,GenBank:XM_003665665.1;gbkey=mRNA;locus_tag=MYCTH_2309690;orig_protein_id=gnl|jgi|MYCTH_2309690;orig_transcript_id=gnl|jgi|MYCTH_mRNA2309690;product=alcohol oxidase;transcript_id=XM_003665665.1
NC_016477.1	RefSeq	exon	6238	8037	.	-	.	ID=exon-XM_003665665.1-2;Parent=rna-XM_003665665.1;Dbxref=GeneID:11511535,GenBank:XM_003665665.1;gbkey=mRNA;locus_tag=MYCTH_2309690;orig_protein_id=gnl|jgi|MYCTH_2309690;orig_transcript_id=gnl|jgi|MYCTH_mRNA2309690;product=alcohol oxidase;transcript_id=XM_003665665.1
NC_016477.1	RefSeq	CDS	8097	8192	.	-	0	ID=cds-XP_003665713.1;Parent=rna-XM_003665665.1;Dbxref=InterPro:IPR006094,InterPro:IPR012951,JGIDB:Spoth2_2309690,GeneID:11511535,GenBank:XP_003665713.1;Name=XP_003665713.1;gbkey=CDS;locus_tag=MYCTH_2309690;orig_transcript_id=gnl|jgi|MYCTH_mRNA2309690;product=alcohol oxidase;protein_id=XP_003665713.1
NC_016477.1	RefSeq	CDS	6337	8037	.	-	0	ID=cds-XP_003665713.1;Parent=rna-XM_003665665.1;Dbxref=InterPro:IPR006094,InterPro:IPR012951,JGIDB:Spoth2_2309690,GeneID:11511535,GenBank:XP_003665713.1;Name=XP_003665713.1;gbkey=CDS;locus_tag=MYCTH_2309690;orig_transcript_id=gnl|jgi|MYCTH_mRNA2309690;product=alcohol oxidase;protein_id=XP_003665713.1
VcBBE
NW_003307545.1	RefSeq	gene	3368940	3371728	.	-	.	ID=gene-VOLCADRAFT_102791;Dbxref=GeneID:9621999;Name=VOLCADRAFT_102791;end_range=3371728,.;gbkey=Gene;gene_biotype=protein_coding;locus_tag=VOLCADRAFT_102791;partial=true
NW_003307545.1	RefSeq	mRNA	3368940	3371728	.	-	.	ID=rna-XM_002946128.1;Parent=gene-VOLCADRAFT_102791;Dbxref=GenBank:XM_002946128.1,GeneID:9621999;Name=XM_002946128.1;end_range=3371728,.;gbkey=mRNA;locus_tag=VOLCADRAFT_102791;partial=true;product=hypothetical protein;transcript_id=XM_002946128.1
NW_003307545.1	RefSeq	exon	3370454	3371728	.	-	.	ID=exon-XM_002946128.1-1;Parent=rna-XM_002946128.1;Dbxref=GenBank:XM_002946128.1,GeneID:9621999;end_range=3371728,.;gbkey=mRNA;locus_tag=VOLCADRAFT_102791;partial=true;product=hypothetical protein;transcript_id=XM_002946128.1
NW_003307545.1	RefSeq	exon	3368940	3369893	.	-	.	ID=exon-XM_002946128.1-2;Parent=rna-XM_002946128.1;Dbxref=GenBank:XM_002946128.1,GeneID:9621999;gbkey=mRNA;locus_tag=VOLCADRAFT_102791;partial=true;product=hypothetical protein;transcript_id=XM_002946128.1
NW_003307545.1	RefSeq	CDS	3370454	3371728	.	-	0	ID=cds-XP_002946174.1;Parent=rna-XM_002946128.1;Dbxref=JGIDB:Volca1_102791,GenBank:XP_002946174.1,GeneID:9621999;Name=XP_002946174.1;Note=predicted protein;gbkey=CDS;locus_tag=VOLCADRAFT_102791;product=hypothetical protein;protein_id=XP_002946174.1
NW_003307545.1	RefSeq	CDS	3369600	3369893	.	-	0	ID=cds-XP_002946174.1;Parent=rna-XM_002946128.1;Dbxref=JGIDB:Volca1_102791,GenBank:XP_002946174.1,GeneID:9621999;Name=XP_002946174.1;Note=predicted protein;gbkey=CDS;locus_tag=VOLCADRAFT_102791;product=hypothetical protein;protein_id=XP_002946174.1
ZmCKX1
NC_050098.1	BestRefSeq	gene	154304659	154307449	.	-	.	ID=gene-LOC542507;Dbxref=GeneID:542507;Name=LOC542507;description=cytokinin oxidase 2;gbkey=Gene;gene=LOC542507;gene_biotype=protein_coding;gene_synonym=cko2,GRMZM2G050997
NC_050098.1	BestRefSeq	mRNA	154304659	154307449	.	-	.	ID=rna-NM_001112056.2;Parent=gene-LOC542507;Dbxref=GeneID:542507,GenBank:NM_001112056.2;Name=NM_001112056.2;gbkey=mRNA;gene=LOC542507;product=cytokinin oxidase 2;transcript_id=NM_001112056.2
NC_050098.1	BestRefSeq	exon	154306649	154307449	.	-	.	ID=exon-NM_001112056.2-1;Parent=rna-NM_001112056.2;Dbxref=GeneID:542507,GenBank:NM_001112056.2;gbkey=mRNA;gene=LOC542507;product=cytokinin oxidase 2;transcript_id=NM_001112056.2
NC_050098.1	BestRefSeq	exon	154306414	154306541	.	-	.	ID=exon-NM_001112056.2-2;Parent=rna-NM_001112056.2;Dbxref=GeneID:542507,GenBank:NM_001112056.2;gbkey=mRNA;gene=LOC542507;product=cytokinin oxidase 2;transcript_id=NM_001112056.2
NC_050098.1	BestRefSeq	exon	154306063	154306323	.	-	.	ID=exon-NM_001112056.2-3;Parent=rna-NM_001112056.2;Dbxref=GeneID:542507,GenBank:NM_001112056.2;gbkey=mRNA;gene=LOC542507;product=cytokinin oxidase 2;transcript_id=NM_001112056.2
NC_050098.1	BestRefSeq	exon	154305727	154305989	.	-	.	ID=exon-NM_001112056.2-4;Parent=rna-NM_001112056.2;Dbxref=GeneID:542507,GenBank:NM_001112056.2;gbkey=mRNA;gene=LOC542507;product=cytokinin oxidase 2;transcript_id=NM_001112056.2
NC_050098.1	BestRefSeq	exon	154304659	154305627	.	-	.	ID=exon-NM_001112056.2-5;Parent=rna-NM_001112056.2;Dbxref=GeneID:542507,GenBank:NM_001112056.2;gbkey=mRNA;gene=LOC542507;product=cytokinin oxidase 2;transcript_id=NM_001112056.2
NC_050098.1	BestRefSeq	CDS	154306649	154307231	.	-	0	ID=cds-NP_001105526.1;Parent=rna-NM_001112056.2;Dbxref=GeneID:542507,GenBank:NP_001105526.1;Name=NP_001105526.1;gbkey=CDS;gene=LOC542507;product=cytokinin oxidase 2 precursor;protein_id=NP_001105526.1
NC_050098.1	BestRefSeq	CDS	154306414	154306541	.	-	2	ID=cds-NP_001105526.1;Parent=rna-NM_001112056.2;Dbxref=GeneID:542507,GenBank:NP_001105526.1;Name=NP_001105526.1;gbkey=CDS;gene=LOC542507;product=cytokinin oxidase 2 precursor;protein_id=NP_001105526.1
NC_050098.1	BestRefSeq	CDS	154306063	154306323	.	-	0	ID=cds-NP_001105526.1;Parent=rna-NM_001112056.2;Dbxref=GeneID:542507,GenBank:NP_001105526.1;Name=NP_001105526.1;gbkey=CDS;gene=LOC542507;product=cytokinin oxidase 2 precursor;protein_id=NP_001105526.1
NC_050098.1	BestRefSeq	CDS	154305727	154305989	.	-	0	ID=cds-NP_001105526.1;Parent=rna-NM_001112056.2;Dbxref=GeneID:542507,GenBank:NP_001105526.1;Name=NP_001105526.1;gbkey=CDS;gene=LOC542507;product=cytokinin oxidase 2 precursor;protein_id=NP_001105526.1
NC_050098.1	BestRefSeq	CDS	154305303	154305627	.	-	1	ID=cds-NP_001105526.1;Parent=rna-NM_001112056.2;Dbxref=GeneID:542507,GenBank:NP_001105526.1;Name=NP_001105526.1;gbkey=CDS;gene=LOC542507;product=cytokinin oxidase 2 precursor;protein_id=NP_001105526.1
DdADHAPS_out
NC_007090.3	RefSeq	gene	4303510	4305817	.	+	.	ID=gene-DDB_G0286183;Dbxref=dictyBase:DDB_G0286183,GeneID:8625550;Name=agps;end_range=4305817,.;gbkey=Gene;gene=agps;gene_biotype=protein_coding;locus_tag=DDB_G0286183;old_locus_tag=DDBDRAFT_0186908%2CDDBDRAFT_0191146%2CDDB_0186908%2CDDB_0191146;partial=true;start_range=.,4303510
NC_007090.3	RefSeq	mRNA	4303510	4305817	.	+	.	ID=rna-XM_632744.1;Parent=gene-DDB_G0286183;Dbxref=dictyBase:DDB0191146,GenBank:XM_632744.1,dictyBase:DDB_G0286183,GeneID:8625550;Name=XM_632744.1;Note=alkyldihydroxyacetonephosphate synthase;end_range=4305817,.;gbkey=mRNA;gene=agps;locus_tag=DDB_G0286183;partial=true;product=alkyl-dihydroxyacetonephosphate synthase;start_range=.,4303510;transcript_id=XM_632744.1
NC_007090.3	RefSeq	exon	4303510	4303910	.	+	.	ID=exon-XM_632744.1-1;Parent=rna-XM_632744.1;Dbxref=dictyBase:DDB0191146,GenBank:XM_632744.1,dictyBase:DDB_G0286183,GeneID:8625550;Note=alkyldihydroxyacetonephosphate synthase;gbkey=mRNA;gene=agps;locus_tag=DDB_G0286183;partial=true;product=alkyl-dihydroxyacetonephosphate synthase;start_range=.,4303510;transcript_id=XM_632744.1
NC_007090.3	RefSeq	exon	4304383	4305817	.	+	.	ID=exon-XM_632744.1-2;Parent=rna-XM_632744.1;Dbxref=dictyBase:DDB0191146,GenBank:XM_632744.1,dictyBase:DDB_G0286183,GeneID:8625550;Note=alkyldihydroxyacetonephosphate synthase;end_range=4305817,.;gbkey=mRNA;gene=agps;locus_tag=DDB_G0286183;partial=true;product=alkyl-dihydroxyacetonephosphate synthase;transcript_id=XM_632744.1
NC_007090.3	RefSeq	CDS	4303510	4303910	.	+	0	ID=cds-XP_637836.1;Parent=rna-XM_632744.1;Dbxref=dictyBase:DDB0191146,GenBank:XP_637836.1,dictyBase:DDB_G0286183,GeneID:8625550;Name=XP_637836.1;gbkey=CDS;gene=agps;locus_tag=DDB_G0286183;product=alkyl-dihydroxyacetonephosphate synthase;protein_id=XP_637836.1
NC_007090.3	RefSeq	CDS	4304383	4305817	.	+	1	ID=cds-XP_637836.1;Parent=rna-XM_632744.1;Dbxref=dictyBase:DDB0191146,GenBank:XP_637836.1,dictyBase:DDB_G0286183,GeneID:8625550;Name=XP_637836.1;gbkey=CDS;gene=agps;locus_tag=DDB_G0286183;product=alkyl-dihydroxyacetonephosphate synthase;protein_id=XP_637836.1
MpBB1
none
E22O
none
LaO
none
Nec5
none
EncM
none
AknOx
none
GilR
none
GOOX
none
Phlp4
none
STOX
none
EcBBE
none
BG60
none
HPM9
none

[truncated: 2 more sheets: SI.Fig.12d, SI.Fig.12e]
